# Supplementary material
Source: PubMed Central journal article supplement (PMC3910433)
Supplement: NIHMS545428-supplement-supplemental_material.pdf [file NIHMS545428-supplement-supplemental_material.pdf]

## Supplementary Information

Bioinformatics and molecular dynamics analyses  
of Ser/Thr motifs in transmembrane proteins

Coral del Val, Stephen H. White, and Ana-Nicoleta Bondar

Supplementary Information contains:

- Figure legends
- Figures S1-S10
- Supplementary Information References

### Figure legends

**Figure S1.** Examples of molecular transporters from data- $\alpha$  set that have significant number of Ser/Thr Signatures. (A) The AMPA subtype ionotropic glutamate receptor (3kg2, Sobolevsky et al, 2009). Chain A is shown as orange ribbons, and chains B-D as transparent ribbons. CA atoms of the Ser/Thr amino acids from chain A are shown as orange van der Waals spheres. (B) The full-length potassium channel KcsA (1f6g, Cortes et al, 2001). Chain A is shown in red, and chains B-D transparent pink. CA atoms of Ser/Thr in chain A are shown as green van der Waals spheres. In panels C-I, the protein is shown is orange, with CA atoms of the Ser/Thr groups as green van der Waals spheres. (C) The AHA2 P-type ATPase proton pump (3b8c, Pederson et al 2007). (D) The P-type ATP-ase Ca<sup>2+</sup> pump (2agv\_a, Obara et al, 2005). (E) The *Neurospora* proton pump (1mhs; Kühlbrandt et al 2002). (F) The ATP-gated P2X4 ion channel (3h9v, chain A, Kawate et al. 2009). (G) The KirBac3.4 potassium channel (Gulbis et al (pdb entry 1XL4). (H). The Wza translocon ((2j58\_A; Dong et al 2006). (I) Mouse P-glycoprotein ABCB1 (3g5u,

chain A; Aller et al, 2009). (J) The arginine-agmatine antiporter (Fang et al 2009). The sequence used in the analysis was extracted from the 3hqq\_A pdb structure. To prepare the image, we used pdb 3ncy, which superseded 3hqq. (K) Aquaporin AQP1 (1J4N chainA; Sui et al 2001). (L) Bovine rhodopsin (3c9l, Stenkamp 2008). (M) The rat muscarinic M3 receptor (2amk; Li et al, 2005). (N) The ShuA transporter (3fhh, Brillet et al). (O) The hemophore receptor HasR (3csl, Krieg et al, 2009). (P) The outer membrane porin (2f1c, Subbarao et al 2006). (Q) The colicin I receptor from *E. coli* (Buchanan et al. 2007). Ser/Thr sidechains are shown as van der Waals spheres with carbon atoms colored cyan, oxygen – red, and nitrogen – blue. (R) *N. europaea* Rh50 protein from Lupo et al. 2007. In the left-hand image, all Ser/Thr sidechains are depicted; the right-hand panel highlights three transmembrane helices (shown in orange) with their Ser/Thr content. (S) Ser/Thr amino acids of bacteriorhodopsin. Ser/Thr sidechains other than the three pairs of consecutive Thr groups (Thr46/Thr47, Thr89/Thr90, and Thr141/Thr142) are shown as van der Waals spheres colored in green. The Asp96 sidechain is depicted as purple van der Waals spheres, and retinal with the Lys216 sidechain as black bonds. The structure of bacteriorhodopsin was taken from Belrhali et al, 1999. In left-hand panel, helix B is highlighted in dark blue; in the right-hand panel, three TM helices (shown in orange) and their Ser/Thr content are highlighted, with remaining TM helices and loops shown in transparent gray.

**Figure S2.** Percentage data- $\alpha$  sequences that contain specific Signatures. The specific signature assessed is indicated for each of the Panels A-F. At least one motif is present in 20-30% of the data set. The presence of 2 Signatures can also be significant: 17% of the proteins have two SxxT motifs (panel B). Detailed analyses of the data- $\alpha$  Signatures is given in Figures S3-S8.

**Figure S3.** Data- $\beta$  sequences that contain specific Signatures. 21-25% of the sequences have at least one Signature. See Figures S9-S14 for detailed analyses of data- $\beta$  Signatures.

**Figure S4.** Summary of the statistical analyses of the sequences in data- $\alpha$  and data- $\beta$ .

**Figure S5.** Summary of the Shapiro test.

**Figures S6.** Number of Signatures per chain in data- $\alpha$ . In Panels A-S, the histogram gives the number and type of a specific Signature present in each chain of data- $\alpha$ . Only chains with at least one Signature are included in the histogram. The insets give the color scheme used for each Signature subset.

**Figures S7.** Number of Signatures per chain in data- $\beta$ . See legend of Figure S6 above for a brief description of how the histograms from panels A-F were computed.

**Figures S8-S9.** Hierarchical clustering of Signatures counts per sequence. Columns correspond to the signatures analyzed (TxxT, SxxxS, TT, ST, SxxT, SS, TxxxT, SxxS). All counts were normalized between 0 and 1 for each Signature (see main Text). The clustering method used was complete linkage using the Euclidean distance as similarity measure. The colors indicate the cluster to which the sequences belong according to the clustering procedure described in the main text. The number of records used is 291 in Figure S8 (data- $\alpha$ ), and 48 in Figure S9 (data- $\beta$ ). The sequences are identified according to the pdb ID and the chain used in the analysis. The numbers under each Signature type indicates the number of Signatures for that particular sequence. For example, sequences 1a91\_A and 1afo\_A have no Signatures.

**Figure S10.** C $\alpha$ -rmsd profiles for peptides in Sim1 (panel A), Sim2 (panel B), Sim3 (panel C), and Sim4 (panel D). For the peptide in Sim1, the total rmsd profile is decomposed into the rmsd for the transmembrane part, and the N- and C-termini (amino acid residues 1-4 and 21-27, respectively). All rmsd values are reported in Å and were computed relative to the starting coordinates of the peptides.

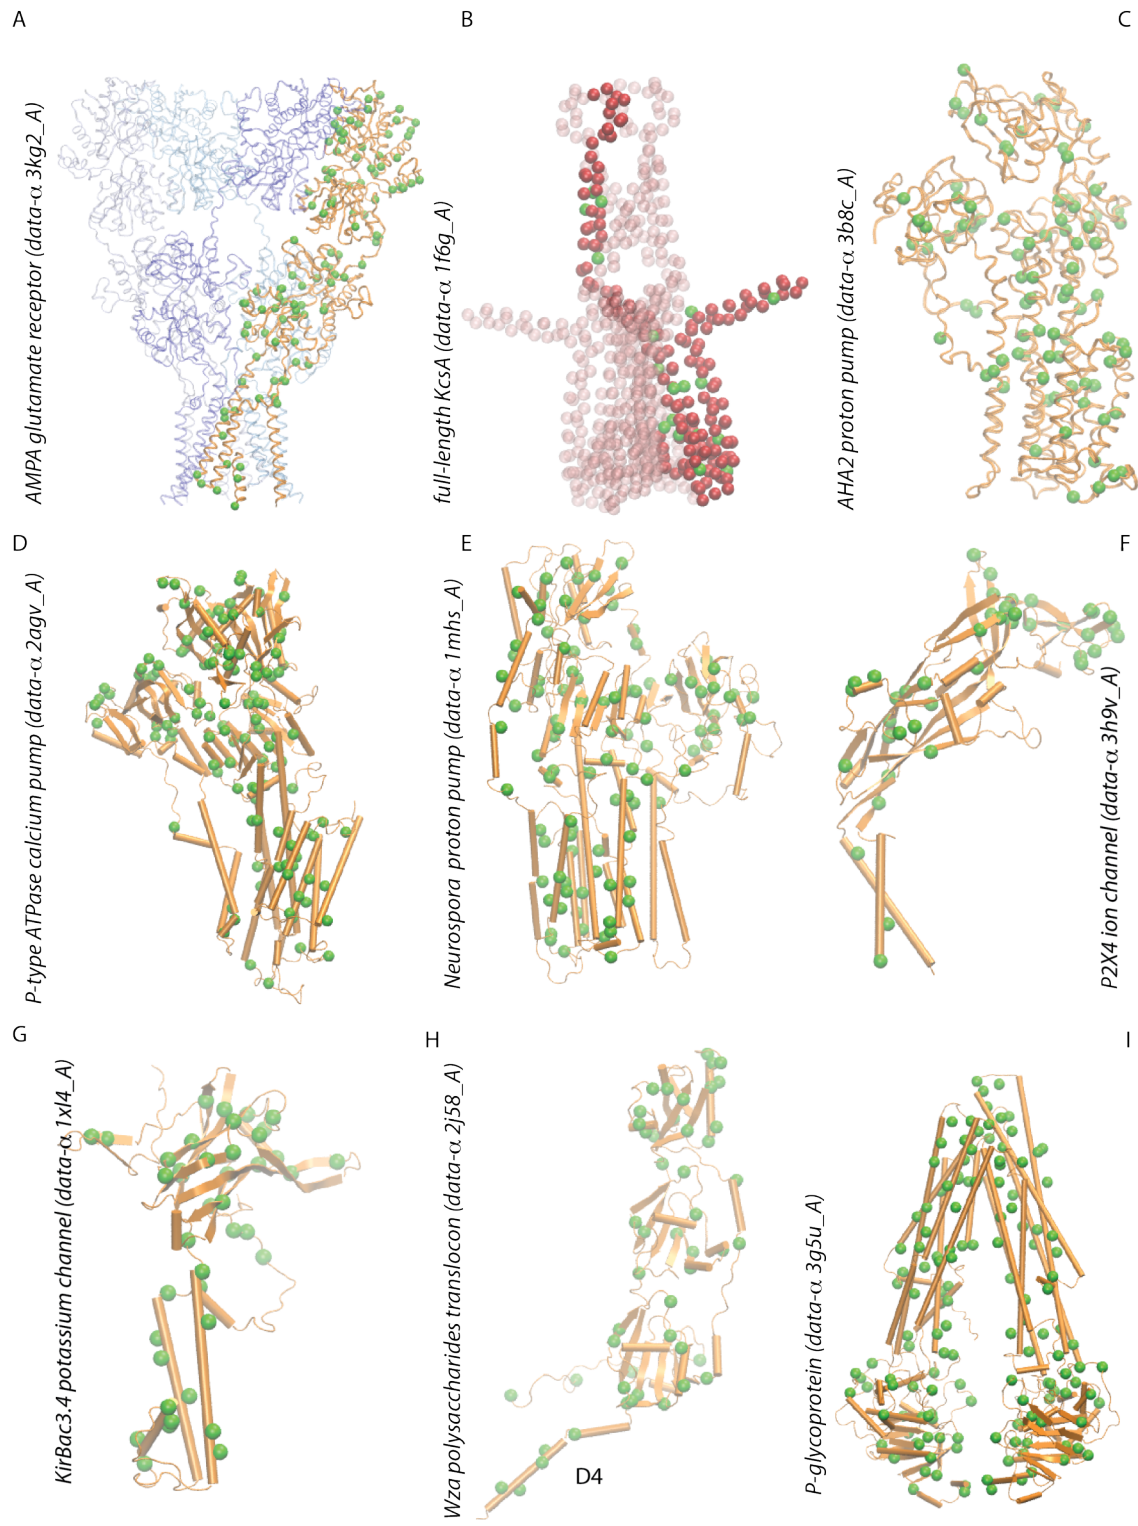

Figure S1- part1, panels A-I



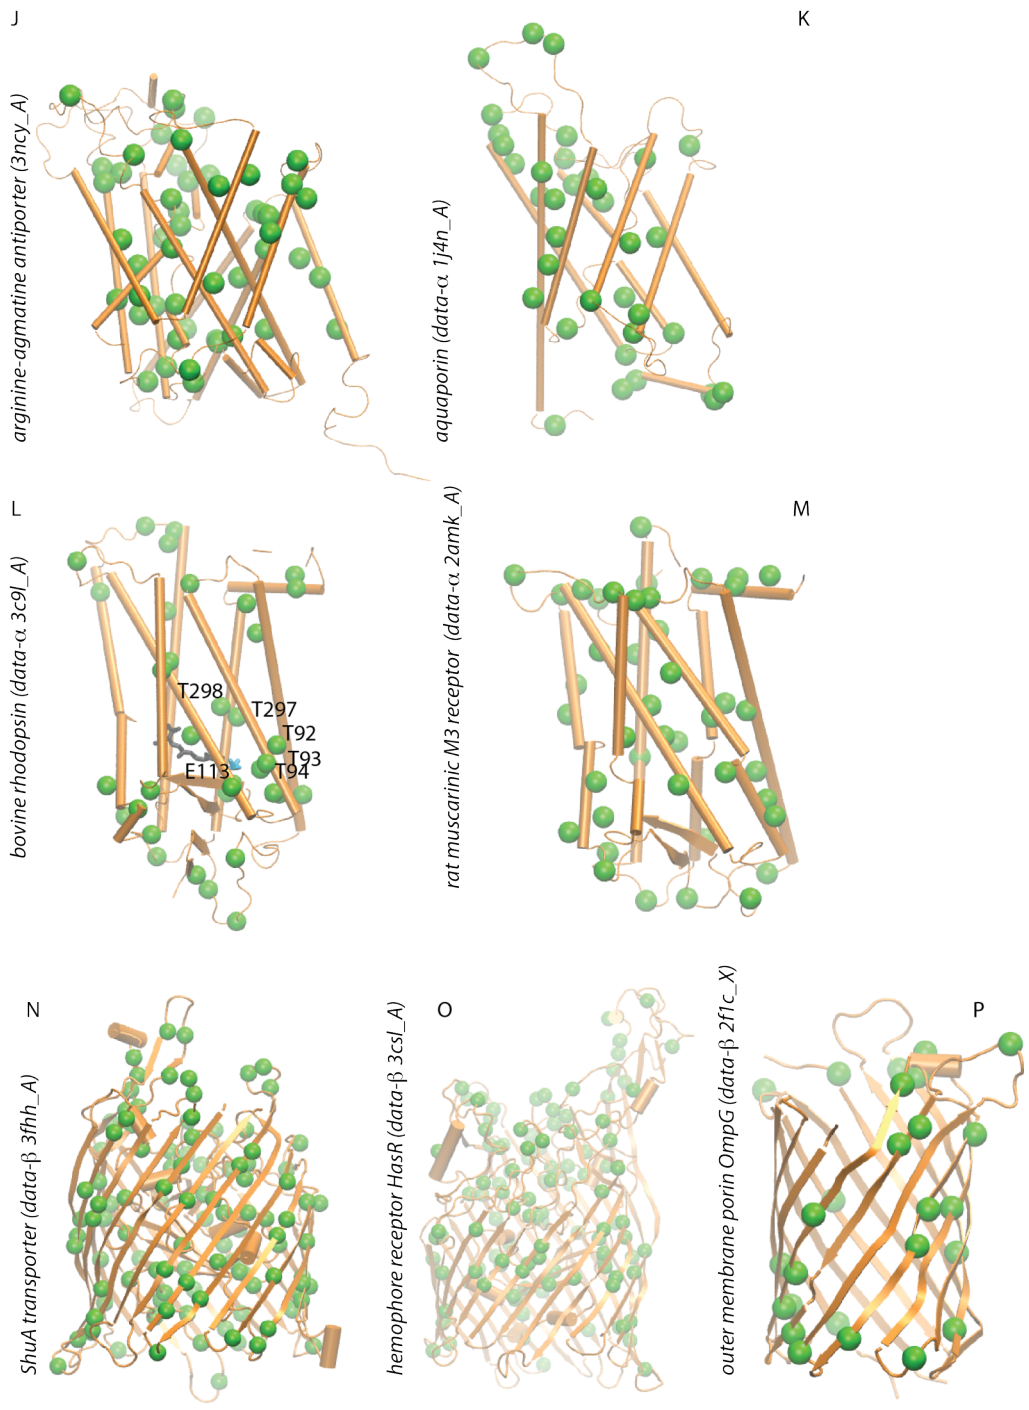

Figure S1- part 2, panels J-P

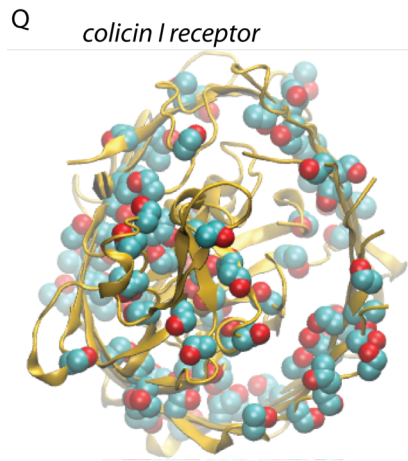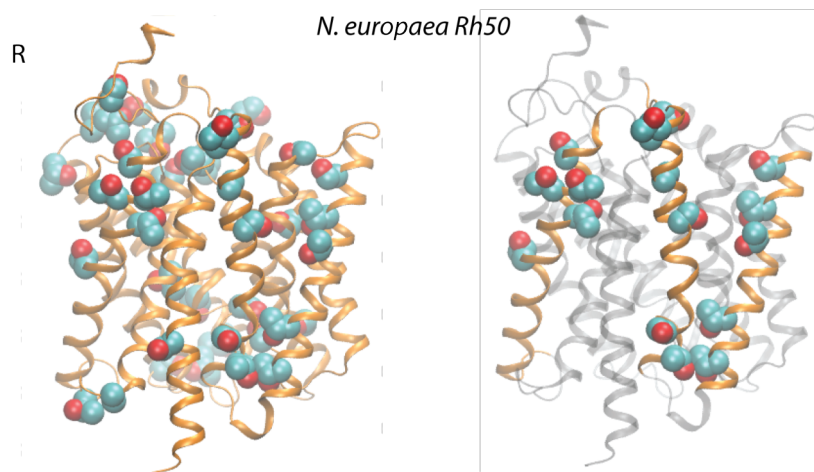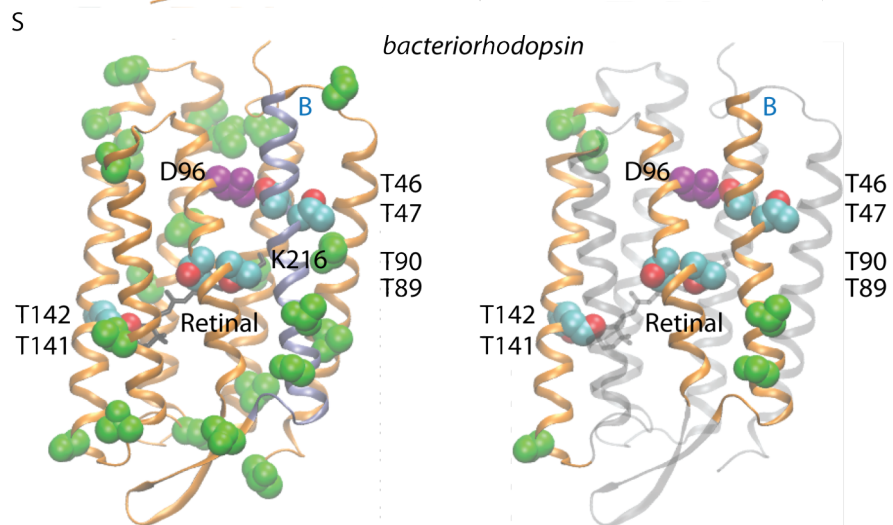

Figure S1 – part 3, panels Q-S

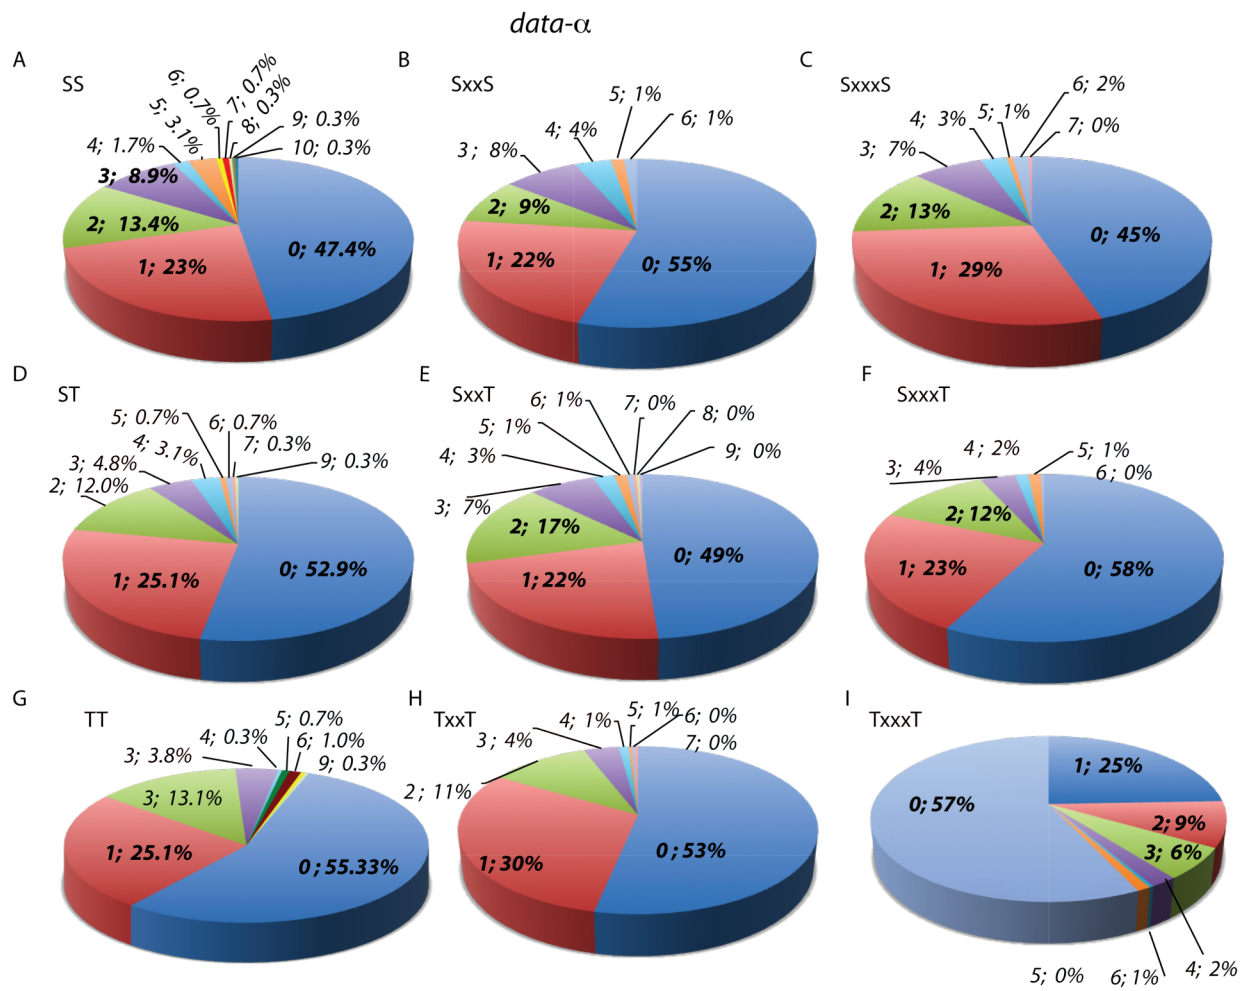

Figure S2

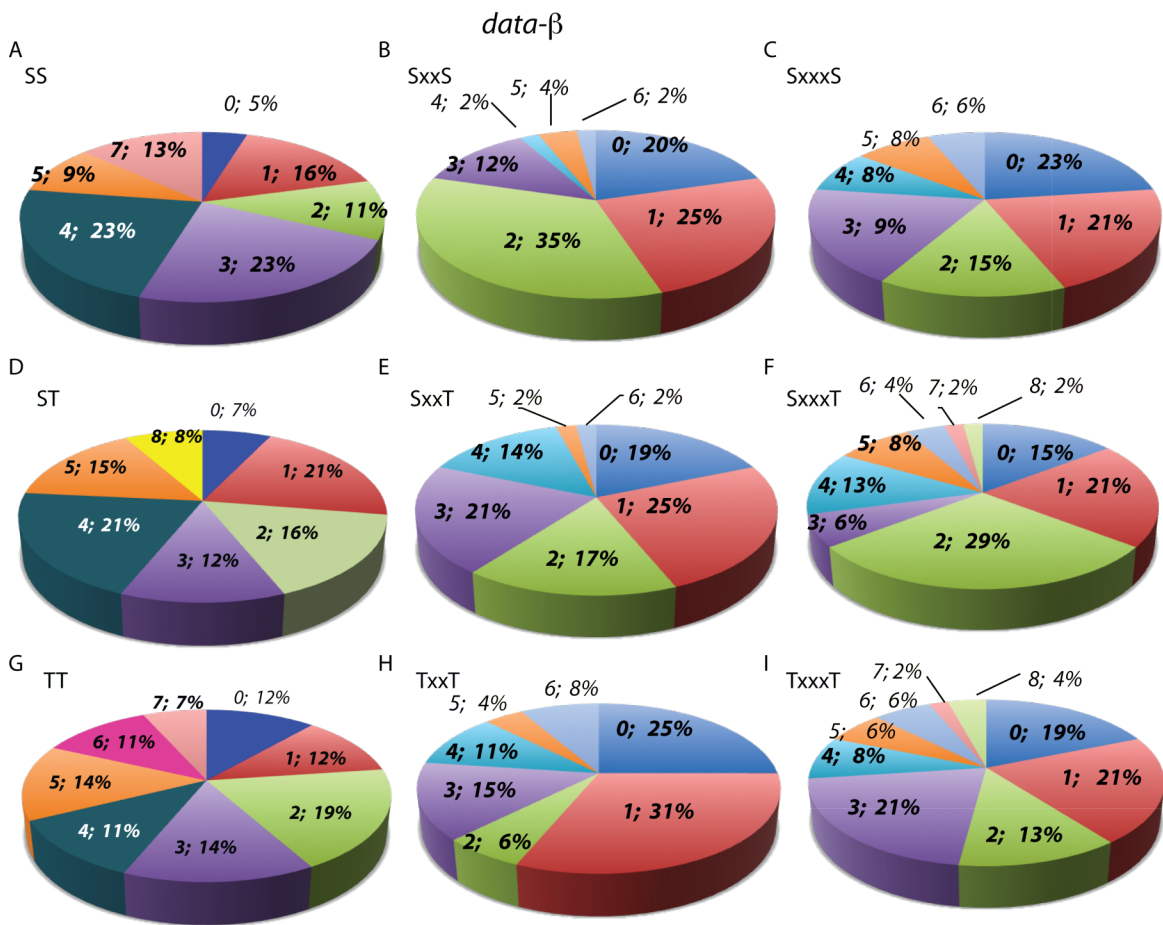

Figure S3

Figure S4-A

| Alpha value (for confidence interval) |        | 0.02                            |       |
|---------------------------------------|--------|---------------------------------|-------|
|                                       |        | Variable #1 (TT)                |       |
| Count                                 | 291    | Skewness                        | 2.28  |
| Mean                                  | 0.76   | Skewness Standard Error         | 0.14  |
| Mean LCL                              | 0.6    | Kurtosis                        | 10.01 |
| Mean UCL                              | 0.92   | Kurtosis Standard Error         | 0.28  |
| Variance                              | 1.31   | Alternative Skewness (Fisher's) | 2.29  |
| Standard Deviation                    | 1.14   | Alternative Kurtosis (Fisher's) | 7.15  |
| Mean Standard Error                   | 0.07   | Coefficient of Variation        | 1.5   |
| Minimum                               | 0.E+0  | Mean Deviation                  | 0.85  |
| Maximum                               | 7      | Second Moment                   | 1.31  |
| Range                                 | 7      | Third Moment                    | 3.4   |
| Sum                                   | 221    | Fourth Moment                   | 17.06 |
| Sum Standard Error                    | 19.49  | Median                          | 0.E+0 |
| Total Sum Squares                     | 547    | Median Error                    | 0     |
| Adjusted Sum Squares                  | 378.58 | Percentile 25% (Q1)             | 0.E+0 |
| Geometric Mean                        | 1.19   | Percentile 75% (Q2)             | 1     |
| Harmonic Mean                         | 2.99   | IQR                             | 1     |
| Mode                                  | 0.E+0  | MAD                             | 0.E+0 |

| Alpha value (for confidence interval) |        | 0.02                            |       |
|---------------------------------------|--------|---------------------------------|-------|
|                                       |        | Variable #1 (ST)                |       |
| Count                                 | 291    | Skewness                        | 2.27  |
| Mean                                  | 0.89   | Skewness Standard Error         | 0.14  |
| Mean LCL                              | 0.71   | Kurtosis                        | 10.2  |
| Mean UCL                              | 1.07   | Kurtosis Standard Error         | 0.28  |
| Variance                              | 1.74   | Alternative Skewness (Fisher's) | 2.28  |
| Standard Deviation                    | 1.32   | Alternative Kurtosis (Fisher's) | 7.35  |
| Mean Standard Error                   | 0.08   | Coefficient of Variation        | 1.48  |
| Minimum                               | 0.E+0  | Mean Deviation                  | 0.94  |
| Maximum                               | 9      | Second Moment                   | 1.73  |
| Range                                 | 9      | Third Moment                    | 5.18  |
| Sum                                   | 259    | Fourth Moment                   | 30.66 |
| Sum Standard Error                    | 22.5   | Median                          | 0.E+0 |
| Total Sum Squares                     | 735    | Median Error                    | 0.01  |
| Adjusted Sum Squares                  | 504.48 | Percentile 25% (Q1)             | 0.E+0 |
| Geometric Mean                        | 1.24   | Percentile 75% (Q2)             | 1     |
| Harmonic Mean                         | 2.96   | IQR                             | 1     |
| Mode                                  | 0.E+0  | MAD                             | 0.E+0 |

| Alpha value (for confidence interval) |        | 0.02                            |       |
|---------------------------------------|--------|---------------------------------|-------|
|                                       |        | Variable #1 (SS)                |       |
| Count                                 | 291    | Skewness                        | 2.11  |
| Mean                                  | 1.17   | Skewness Standard Error         | 0.14  |
| Mean LCL                              | 0.95   | Kurtosis                        | 8.77  |
| Mean UCL                              | 1.4    | Kurtosis Standard Error         | 0.28  |
| Variance                              | 2.68   | Alternative Skewness (Fisher's) | 2.12  |
| Standard Deviation                    | 1.64   | Alternative Kurtosis (Fisher's) | 5.89  |
| Mean Standard Error                   | 0.1    | Coefficient of Variation        | 1.4   |
| Minimum                               | 0.E+0  | Mean Deviation                  | 1.19  |
| Maximum                               | 10     | Second Moment                   | 2.67  |
| Range                                 | 10     | Third Moment                    | 9.22  |
| Sum                                   | 341    | Fourth Moment                   | 62.61 |
| Sum Standard Error                    | 27.93  | Median                          | 1     |
| Total Sum Squares                     | 1,177  | Median Error                    | 0.01  |
| Adjusted Sum Squares                  | 777.41 | Percentile 25% (Q1)             | 0.E+0 |
| Geometric Mean                        | 1.37   | Percentile 75% (Q2)             | 2     |
| Harmonic Mean                         | 2.93   | IQR                             | 2     |
| Mode                                  | 0.E+0  | MAD                             | 1     |

| Alpha value (for confidence interval) |        | 0.02                            |       |
|---------------------------------------|--------|---------------------------------|-------|
|                                       |        | Variable #1 (TT)                |       |
| Count                                 | 48     | Skewness                        | 0.97  |
| Mean                                  | 1.94   | Skewness Standard Error         | 0.34  |
| Mean LCL                              | 1.29   | Kurtosis                        | 3.16  |
| Mean UCL                              | 2.58   | Kurtosis Standard Error         | 0.63  |
| Variance                              | 3.42   | Alternative Skewness (Fisher's) | 1     |
| Standard Deviation                    | 1.85   | Alternative Kurtosis (Fisher's) | 0.32  |
| Mean Standard Error                   | 0.27   | Coefficient of Variation        | 0.95  |
| Minimum                               | 0.E+0  | Mean Deviation                  | 1.44  |
| Maximum                               | 7      | Second Moment                   | 3.35  |
| Range                                 | 7      | Third Moment                    | 5.94  |
| Sum                                   | 93     | Fourth Moment                   | 35.51 |
| Sum Standard Error                    | 12.82  | Median                          | 1.5   |
| Total Sum Squares                     | 341    | Median Error                    | 0.05  |
| Adjusted Sum Squares                  | 160.81 | Percentile 25% (Q1)             | 1     |
| Geometric Mean                        | 1.75   | Percentile 75% (Q2)             | 3     |
| Harmonic Mean                         | 2.34   | IQR                             | 2     |
| Mode                                  | #N/A   | MAD                             | 1.5   |

| Alpha value (for confidence interval) |        | 0.02                            |       |
|---------------------------------------|--------|---------------------------------|-------|
|                                       |        | Variable #1 (ST)                |       |
| Count                                 | 48     | Skewness                        | 1.36  |
| Mean                                  | 1.9    | Skewness Standard Error         | 0.34  |
| Mean LCL                              | 1.31   | Kurtosis                        | 4.97  |
| Mean UCL                              | 2.48   | Kurtosis Standard Error         | 0.63  |
| Variance                              | 2.86   | Alternative Skewness (Fisher's) | 1.41  |
| Standard Deviation                    | 1.69   | Alternative Kurtosis (Fisher's) | 2.33  |
| Mean Standard Error                   | 0.24   | Coefficient of Variation        | 0.89  |
| Minimum                               | 0.E+0  | Mean Deviation                  | 1.3   |
| Maximum                               | 8      | Second Moment                   | 2.8   |
| Range                                 | 8      | Third Moment                    | 6.4   |
| Sum                                   | 91     | Fourth Moment                   | 39.05 |
| Sum Standard Error                    | 11.72  | Median                          | 1     |
| Total Sum Squares                     | 307    | Median Error                    | 0.04  |
| Adjusted Sum Squares                  | 134.48 | Percentile 25% (Q1)             | 1     |
| Geometric Mean                        | 1.64   | Percentile 75% (Q2)             | 3     |
| Harmonic Mean                         | 1.76   | IQR                             | 2     |
| Mode                                  | 1      | MAD                             | 1     |

| Alpha value (for confidence interval) |        | 0.02                            |        |
|---------------------------------------|--------|---------------------------------|--------|
|                                       |        | Variable #1 (SS)                |        |
| Count                                 | 48     | Skewness                        | 1.75   |
| Mean                                  | 2.33   | Skewness Standard Error         | 0.34   |
| Mean LCL                              | 1.59   | Kurtosis                        | 7.13   |
| Mean UCL                              | 3.08   | Kurtosis Standard Error         | 0.63   |
| Variance                              | 4.61   | Alternative Skewness (Fisher's) | 1.81   |
| Standard Deviation                    | 2.15   | Alternative Kurtosis (Fisher's) | 4.73   |
| Mean Standard Error                   | 0.31   | Coefficient of Variation        | 0.92   |
| Minimum                               | 0.E+0  | Mean Deviation                  | 1.61   |
| Maximum                               | 11     | Second Moment                   | 4.51   |
| Range                                 | 11     | Third Moment                    | 16.78  |
| Sum                                   | 112    | Fourth Moment                   | 145.23 |
| Sum Standard Error                    | 14.88  | Median                          | 2      |
| Total Sum Squares                     | 478    | Median Error                    | 0.06   |
| Adjusted Sum Squares                  | 216.67 | Percentile 25% (Q1)             | 1      |
| Geometric Mean                        | 1.9    | Percentile 75% (Q2)             | 3      |
| Harmonic Mean                         | 1.92   | IQR                             | 2      |
| Mode                                  | 1      | MAD                             | 1      |

Figure S4-B

## ALPHA Chains

| Variable #1 (Count SxxxS) |           |                                 |          |
|---------------------------|-----------|---------------------------------|----------|
| Count                     | 291       | Skewness                        | 1.81268  |
| Mean                      | 1.05498   | Skewness Standard Error         | 0.14237  |
| Mean LCL                  | 0.86905   | Kurtosis                        | 7.07353  |
| Mean UCL                  | 1.24091   | Kurtosis Standard Error         | 0.28183  |
| Variance                  | 1.83835   | Alternative Skewness (Fisher's) | 1.82209  |
| Standard Deviation        | 1.35586   | Alternative Kurtosis (Fisher's) | 4.1653   |
| Mean Standard Error       | 0.07948   | Coefficient of Variation        | 1.28519  |
| Minimum                   | 0.E+0     | Mean Deviation                  | 0.97472  |
| Maximum                   | 8.        | Second Moment                   | 1.83203  |
| Range                     | 8.        | Third Moment                    | 4.49489  |
| Sum                       | 307.      | Fourth Moment                   | 23.74108 |
| Sum Standard Error        | 23.12917  | Median                          | 1.       |
| Total Sum Squares         | 857.      | Median Error                    | 0.00584  |
| Adjusted Sum Squares      | 533.12027 | Percentile 25% (Q1)             | 0.E+0    |
| Geometric Mean            | 1.29781   | Percentile 75% (Q2)             | 2.       |
| Harmonic Mean             | 2.53724   | IQR                             | 2.       |
| Mode                      | 0.E+0     | MAD                             | 1.       |

| Variable #2 (Count SxxS) |           |                                 |          |
|--------------------------|-----------|---------------------------------|----------|
| Count                    | 291       | Skewness                        | 1.65303  |
| Mean                     | 0.93471   | Skewness Standard Error         | 0.14237  |
| Mean LCL                 | 0.74797   | Kurtosis                        | 5.3019   |
| Mean UCL                 | 1.12144   | Kurtosis Standard Error         | 0.28183  |
| Variance                 | 1.85434   | Alternative Skewness (Fisher's) | 1.66161  |
| Standard Deviation       | 1.36174   | Alternative Kurtosis (Fisher's) | 2.36286  |
| Mean Standard Error      | 0.07983   | Coefficient of Variation        | 1.45686  |
| Minimum                  | 0.E+0     | Mean Deviation                  | 1.02143  |
| Maximum                  | 6.        | Second Moment                   | 1.84797  |
| Range                    | 6.        | Third Moment                    | 4.15263  |
| Sum                      | 272.      | Fourth Moment                   | 18.10598 |
| Sum Standard Error       | 23.22959  | Median                          | 0.E+0    |
| Total Sum Squares        | 792.      | Median Error                    | 0.00586  |
| Adjusted Sum Squares     | 537.75945 | Percentile 25% (Q1)             | 0.E+0    |
| Geometric Mean           | 1.27831   | Percentile 75% (Q2)             | 1.       |
| Harmonic Mean            | 3.25564   | IQR                             | 1.       |
| Mode                     | 0.E+0     | MAD                             | 0.E+0    |

| Variable #3 (Count SxxT) |           |                                 |          |
|--------------------------|-----------|---------------------------------|----------|
| Count                    | 291       | Skewness                        | 2.02538  |
| Mean                     | 1.05498   | Skewness Standard Error         | 0.14237  |
| Mean LCL                 | 0.85788   | Kurtosis                        | 8.72826  |
| Mean UCL                 | 1.25209   | Kurtosis Standard Error         | 0.28183  |
| Variance                 | 2.06593   | Alternative Skewness (Fisher's) | 2.03589  |
| Standard Deviation       | 1.43734   | Alternative Kurtosis (Fisher's) | 5.84882  |
| Mean Standard Error      | 0.08426   | Coefficient of Variation        | 1.36243  |
| Minimum                  | 0.E+0     | Mean Deviation                  | 1.05379  |
| Maximum                  | 9.        | Second Moment                   | 2.05883  |
| Range                    | 9.        | Third Moment                    | 5.98326  |
| Sum                      | 307.      | Fourth Moment                   | 36.99726 |
| Sum Standard Error       | 24.5191   | Median                          | 1.       |
| Total Sum Squares        | 923.      | Median Error                    | 0.00619  |
| Adjusted Sum Squares     | 599.12027 | Percentile 25% (Q1)             | 0.E+0    |
| Geometric Mean           | 1.32682   | Percentile 75% (Q2)             | 2.       |
| Harmonic Mean            | 2.96146   | IQR                             | 2.       |
| Mode                     | 0.E+0     | MAD                             | 1.       |

| Variable #4 (Count SxxxT) |           |                                 |          |
|---------------------------|-----------|---------------------------------|----------|
| Count                     | 291       | Skewness                        | 2.04607  |
| Mean                      | 0.7354    | Skewness Standard Error         | 0.14237  |
| Mean LCL                  | 0.58205   | Kurtosis                        | 8.28952  |
| Mean UCL                  | 0.88874   | Kurtosis Standard Error         | 0.28183  |
| Variance                  | 1.25043   | Alternative Skewness (Fisher's) | 2.05668  |
| Standard Deviation        | 1.11823   | Alternative Kurtosis (Fisher's) | 5.40245  |
| Mean Standard Error       | 0.06555   | Coefficient of Variation        | 1.52058  |
| Minimum                   | 0.E+0     | Mean Deviation                  | 0.84912  |
| Maximum                   | 7.        | Second Moment                   | 1.24614  |
| Range                     | 7.        | Third Moment                    | 2.84621  |
| Sum                       | 214.      | Fourth Moment                   | 12.87241 |
| Sum Standard Error        | 19.07553  | Median                          | 0.E+0    |
| Total Sum Squares         | 520.      | Median Error                    | 0.00482  |
| Adjusted Sum Squares      | 362.62543 | Percentile 25% (Q1)             | 0.E+0    |
| Geometric Mean            | 1.18858   | Percentile 75% (Q2)             | 1.       |
| Harmonic Mean             | 3.19396   | IQR                             | 1.       |
| Mode                      | 0.E+0     | MAD                             | 0.E+0    |

## BETA CHAINS

| Variable #1 (Count SxxxS) |          |                                 |          |
|---------------------------|----------|---------------------------------|----------|
| Count                     | 48       | Skewness                        | 0.51381  |
| Mean                      | 2.1875   | Skewness Standard Error         | 0.33592  |
| Mean LCL                  | 1.5435   | Kurtosis                        | 2.21899  |
| Mean UCL                  | 2.8315   | Kurtosis Standard Error         | 0.63196  |
| Variance                  | 3.43218  | Alternative Skewness (Fisher's) | 0.53054  |
| Standard Deviation        | 1.85261  | Alternative Kurtosis (Fisher's) | -0.73269 |
| Mean Standard Error       | 0.2674   | Coefficient of Variation        | 0.84691  |
| Minimum                   | 0.E+0    | Mean Deviation                  | 1.55208  |
| Maximum                   | 6.       | Second Moment                   | 3.36068  |
| Range                     | 6.       | Third Moment                    | 3.16553  |
| Sum                       | 105.     | Fourth Moment                   | 25.06156 |
| Sum Standard Error        | 12.83529 | Median                          | 2.       |
| Total Sum Squares         | 391.     | Median Error                    | 0.04837  |
| Adjusted Sum Squares      | 161.3125 | Percentile 25% (Q1)             | 1.       |
| Geometric Mean            | 1.9517   | Percentile 75% (Q2)             | 3.       |
| Harmonic Mean             | 2.55319  | IQR                             | 2.       |
| Mode                      | 0.E+0    | MAD                             | 1.       |

| Variable #2 (Count SxxS) |           |                                 |          |
|--------------------------|-----------|---------------------------------|----------|
| Count                    | 48        | Skewness                        | 1.61804  |
| Mean                     | 1.79167   | Skewness Standard Error         | 0.33592  |
| Mean LCL                 | 1.26007   | Kurtosis                        | 7.27672  |
| Mean UCL                 | 2.32326   | Kurtosis Standard Error         | 0.63196  |
| Variance                 | 2.33865   | Alternative Skewness (Fisher's) | 1.67071  |
| Standard Deviation       | 1.52927   | Alternative Kurtosis (Fisher's) | 4.89434  |
| Mean Standard Error      | 0.22073   | Coefficient of Variation        | 0.85354  |
| Minimum                  | 0.E+0     | Mean Deviation                  | 1.06771  |
| Maximum                  | 8.        | Second Moment                   | 2.28993  |
| Range                    | 8.        | Third Moment                    | 5.60692  |
| Sum                      | 86.       | Fourth Moment                   | 38.15754 |
| Sum Standard Error       | 10.59506  | Median                          | 2.       |
| Total Sum Squares        | 264.      | Median Error                    | 0.03993  |
| Adjusted Sum Squares     | 109.91667 | Percentile 25% (Q1)             | 1.       |
| Geometric Mean           | 1.68553   | Percentile 75% (Q2)             | 2.       |
| Harmonic Mean            | 2.0623    | IQR                             | 1.       |
| Mode                     | 2.        | MAD                             | 1.       |

| Variable #3 (Count SxxT) |           |                                 |          |
|--------------------------|-----------|---------------------------------|----------|
| Count                    | 48        | Skewness                        | 0.39149  |
| Mean                     | 2.02083   | Skewness Standard Error         | 0.33592  |
| Mean LCL                 | 1.48668   | Kurtosis                        | 2.37423  |
| Mean UCL                 | 2.55499   | Kurtosis Standard Error         | 0.63196  |
| Variance                 | 2.36126   | Alternative Skewness (Fisher's) | 0.40423  |
| Standard Deviation       | 1.53664   | Alternative Kurtosis (Fisher's) | -0.55998 |
| Mean Standard Error      | 0.22179   | Coefficient of Variation        | 0.7604   |
| Minimum                  | 0.E+0     | Mean Deviation                  | 1.27517  |
| Maximum                  | 6.        | Second Moment                   | 2.31207  |
| Range                    | 6.        | Third Moment                    | 1.37632  |
| Sum                      | 97.       | Fourth Moment                   | 12.69179 |
| Sum Standard Error       | 10.64615  | Median                          | 2.       |
| Total Sum Squares        | 307.      | Median Error                    | 0.04012  |
| Adjusted Sum Squares     | 110.97917 | Percentile 25% (Q1)             | 1.       |
| Geometric Mean           | 1.85415   | Percentile 75% (Q2)             | 3.       |
| Harmonic Mean            | 2.23776   | IQR                             | 2.       |
| Mode                     | 1.        | MAD                             | 1.       |

| Variable #4 (Count SxxxT) |          |                                 |          |
|---------------------------|----------|---------------------------------|----------|
| Count                     | 48       | Skewness                        | 0.81957  |
| Mean                      | 2.4375   | Skewness Standard Error         | 0.33592  |
| Mean LCL                  | 1.74262  | Kurtosis                        | 3.05187  |
| Mean UCL                  | 3.13238  | Kurtosis Standard Error         | 0.63196  |
| Variance                  | 3.99601  | Alternative Skewness (Fisher's) | 0.84625  |
| Standard Deviation        | 1.999    | Alternative Kurtosis (Fisher's) | 0.19395  |
| Mean Standard Error       | 0.28853  | Coefficient of Variation        | 0.8201   |
| Minimum                   | 0.E+0    | Mean Deviation                  | 1.60677  |
| Maximum                   | 8.       | Second Moment                   | 3.91276  |
| Range                     | 8.       | Third Moment                    | 6.34326  |
| Sum                       | 117.     | Fourth Moment                   | 46.72326 |
| Sum Standard Error        | 13.84949 | Median                          | 0.522    |
| Total Sum Squares         | 473.     | Median Error                    | 0.0522   |
| Adjusted Sum Squares      | 187.8125 | Percentile 25% (Q1)             | 1.       |
| Geometric Mean            | 2.08915  | Percentile 75% (Q2)             | 4.       |
| Harmonic Mean             | 2.41192  | IQR                             | 3.       |
| Mode                      | 2.       | MAD                             | 1.       |



Figure S4-C

| Variable #5 (Count TxxxT) |                |                                 |          |
|---------------------------|----------------|---------------------------------|----------|
| Count                     | 291            | Skewness                        | 1.92348  |
| <b>Mean</b>               | <b>0.76976</b> | Skewness Standard Error         | 0.14237  |
| Mean LCL                  | 0.61001        | Kurtosis                        | 7.10462  |
| Mean UCL                  | 0.92951        | Kurtosis Standard Error         | 0.28183  |
| <b>Variance</b>           | <b>1.35715</b> | Alternative Skewness (Fisher's) | 1.93346  |
| Standard Deviation        | 1.16497        | Alternative Kurtosis (Fisher's) | 4.19694  |
| Mean Standard Error       | 0.06829        | Coefficient of Variation        | 1.51342  |
| Minimum                   | 0.E+0          | Mean Deviation                  | 0.87821  |
| Maximum                   | 6.             | Second Moment                   | 1.35249  |
| Range                     | 6.             | Third Moment                    | 3.02544  |
| Sum                       | 224.           | Fourth Moment                   | 12.99594 |
| Sum Standard Error        | 19.87287       | Median                          | 0.E+0    |
| Total Sum Squares         | 566.           | Median Error                    | 0.00502  |
| Adjusted Sum Squares      | 393.57388      | Percentile 25% (Q1)             | 0.E+0    |
| Geometric Mean            | 1.20018        | Percentile 75% (Q2)             | 1.       |
| Harmonic Mean             | 3.15618        | IQR                             | 1.       |
| Mode                      | 0.E+0          | MAD                             | 0.E+0    |

| Variable #5 (Count TxxxT) |                |                                 |          |
|---------------------------|----------------|---------------------------------|----------|
| Count                     | 48             | Skewness                        | 0.77054  |
| <b>Mean</b>               | <b>2.58333</b> | Skewness Standard Error         | 0.33592  |
| Mean LCL                  | 1.81827        | Kurtosis                        | 2.8654   |
| Mean UCL                  | 3.3484         | Kurtosis Standard Error         | 0.63196  |
| <b>Variance</b>           | <b>4.84397</b> | Alternative Skewness (Fisher's) | 0.79563  |
| Standard Deviation        | 2.2009         | Alternative Kurtosis (Fisher's) | -0.01352 |
| Mean Standard Error       | 0.31767        | Coefficient of Variation        | 0.85196  |
| Minimum                   | 0.E+0          | Mean Deviation                  | 1.77431  |
| Maximum                   | 8.             | Second Moment                   | 4.74306  |
| Range                     | 8.             | Third Moment                    | 7.95949  |
| Sum                       | 124.           | Fourth Moment                   | 64.46166 |
| Sum Standard Error        | 15.2483        | Median                          | 2.       |
| Total Sum Squares         | 548.           | Median Error                    | 0.05747  |
| Adjusted Sum Squares      | 227.66667      | Percentile 25% (Q1)             | 1.       |
| Geometric Mean            | 2.1615         | Percentile 75% (Q2)             | 4.       |
| Harmonic Mean             | 2.54964        | IQR                             | 3.       |
| Mode                      | #N/A           | MAD                             | 1.       |

| Variable #6 (Count TxxT) |                |                                 |          |
|--------------------------|----------------|---------------------------------|----------|
| Count                    | 291            | Skewness                        | 2.17813  |
| <b>Mean</b>              | <b>0.73196</b> | Skewness Standard Error         | 0.14237  |
| Mean LCL                 | 0.58947        | Kurtosis                        | 10.10485 |
| Mean UCL                 | 0.87444        | Kurtosis Standard Error         | 0.28183  |
| <b>Variance</b>          | <b>1.07963</b> | Alternative Skewness (Fisher's) | 2.18943  |
| Standard Deviation       | 1.03905        | Alternative Kurtosis (Fisher's) | 7.24936  |
| Mean Standard Error      | 0.06091        | Coefficient of Variation        | 1.41955  |
| Minimum                  | 0.E+0          | Mean Deviation                  | 0.77975  |
| Maximum                  | 7.             | Second Moment                   | 1.07592  |
| Range                    | 7.             | Third Moment                    | 2.43082  |
| Sum                      | 213.           | Fourth Moment                   | 11.69741 |
| Sum Standard Error       | 17.72491       | Median                          | 0.E+0    |
| Total Sum Squares        | 469.           | Median Error                    | 0.00448  |
| Adjusted Sum Squares     | 313.09278      | Percentile 25% (Q1)             | 0.E+0    |
| Geometric Mean           | 1.15955        | Percentile 75% (Q2)             | 1.       |
| Harmonic Mean            | 2.68385        | IQR                             | 1.       |
| Mode                     | 0.E+0          | MAD                             | 0.E+0    |

| Variable #6 (Count TxxT) |                |                                 |          |
|--------------------------|----------------|---------------------------------|----------|
| Count                    | 48             | Skewness                        | 0.75555  |
| <b>Mean</b>              | <b>2.</b>      | Skewness Standard Error         | 0.33592  |
| Mean LCL                 | 1.33501        | Kurtosis                        | 2.4013   |
| Mean UCL                 | 2.66499        | Kurtosis Standard Error         | 0.63196  |
| <b>Variance</b>          | <b>3.65957</b> | Alternative Skewness (Fisher's) | 0.78014  |
| Standard Deviation       | 1.913          | Alternative Kurtosis (Fisher's) | -0.52986 |
| Mean Standard Error      | 0.27612        | Coefficient of Variation        | 0.9565   |
| Minimum                  | 0.E+0          | Mean Deviation                  | 1.625    |
| Maximum                  | 6.             | Second Moment                   | 3.58333  |
| Range                    | 6.             | Third Moment                    | 5.125    |
| Sum                      | 96.            | Fourth Moment                   | 30.83333 |
| Sum Standard Error       | 13.25366       | Median                          | 1.       |
| Total Sum Squares        | 364.           | Median Error                    | 0.04995  |
| Adjusted Sum Squares     | 172.           | Percentile 25% (Q1)             | 1.       |
| Geometric Mean           | 1.75824        | Percentile 75% (Q2)             | 3.       |
| Harmonic Mean            | 2.2695         | IQR                             | 2.       |
| Mode                     | 1.             | MAD                             | 1.       |

| Signature | Alpha chains |          |                     | Beta chains |           |                     |
|-----------|--------------|----------|---------------------|-------------|-----------|---------------------|
|           | W            | P        | Normal Distribution | W           | P         | Normal Distribution |
| SxxxS     | 0.7575       | 2.20E-16 | No                  | 0.9046      | 0.0008876 | No                  |
| SxxS      | 0.7193       | 2.20E-16 | No                  | 0.8342      | 8.48E-06  | No                  |
| SxxT      | 0.7368       | 2.20E-16 | No                  | 0.9215      | 0.003362  | No                  |
| SxxxT     | 0.6908       | 2.20E-16 | No                  | 0.9062      | 0.001001  | No                  |
| TxxxT     | 0.6951       | 2.20E-16 | No                  | 0.9068      | 0.001051  | No                  |
| TxxT      | 0.703        | 2.20E-16 | No                  | 0.8591      | 3.83E-05  | No                  |

if the p-value is less than the chosen alpha level (0.05), then the null hypothesis is rejected

Figure S5



# Data- $\alpha$ , SxxS Signatures - Part 1-

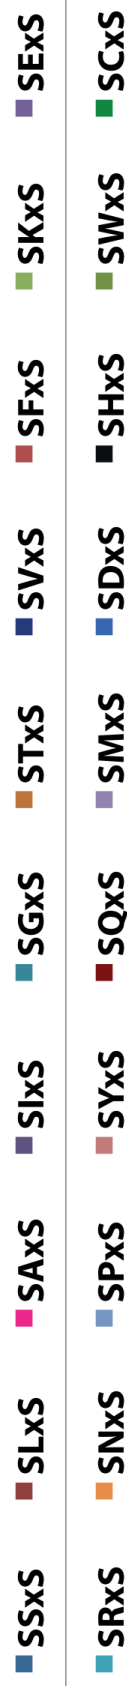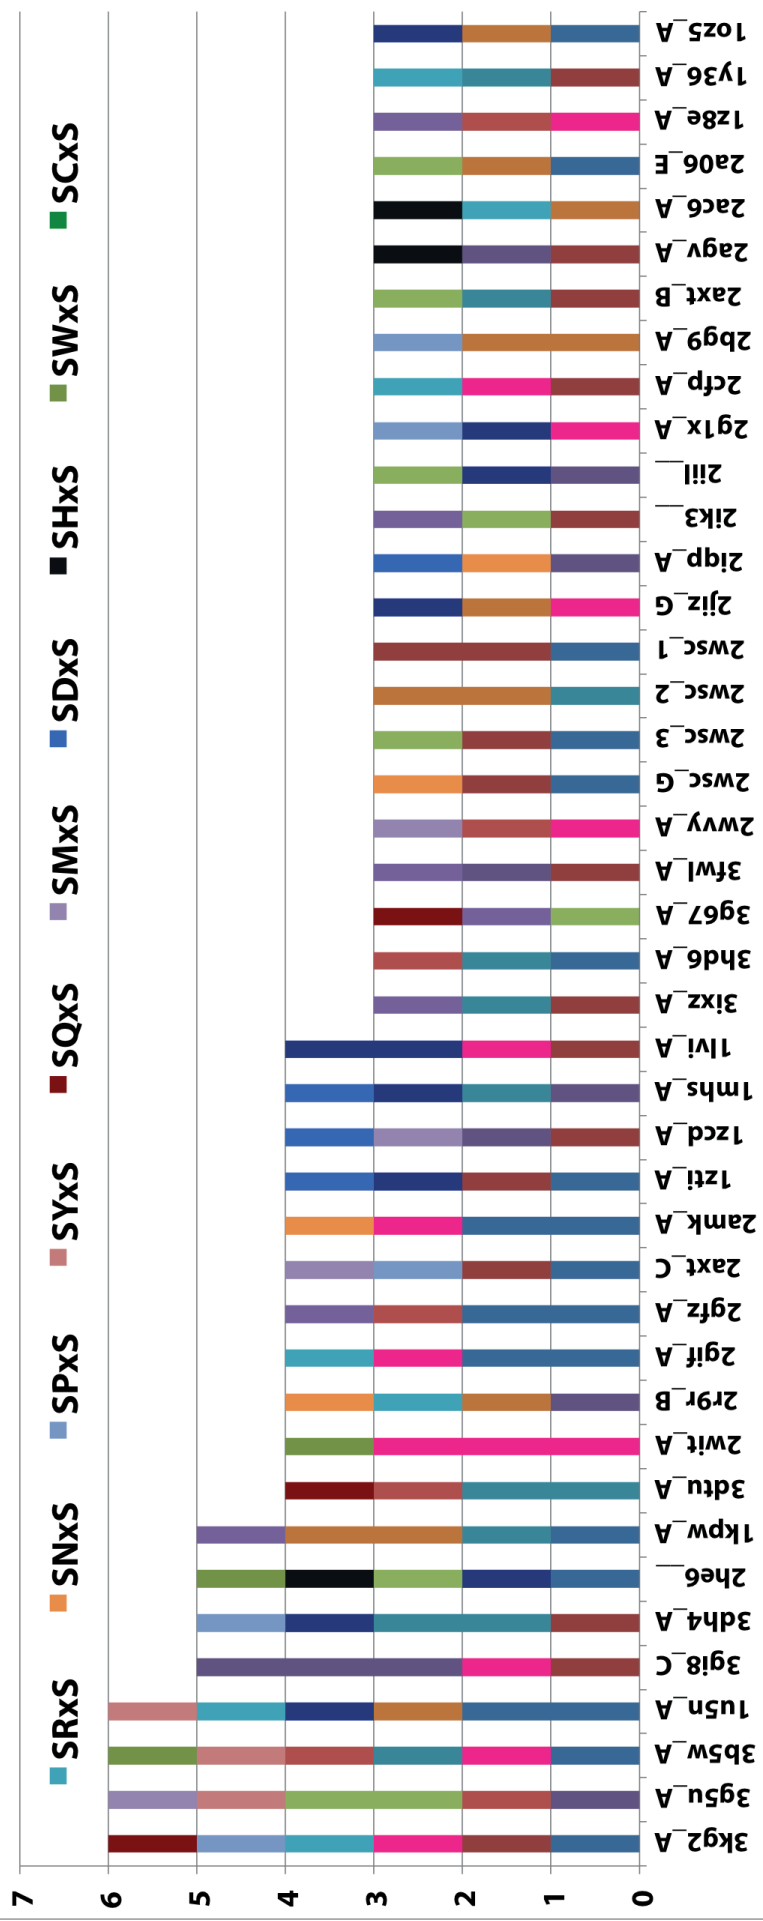

Figure S6-A

Figure S6-B

## Data- $\alpha$ SxxS Signatures -Part 2-

- SxxS
- SLxS
- SAXS
- SLxS
- SGxS
- STxS
- SVxS
- SFxS
- SKxS
- SExS
- SRxS
- SNxS
- SPxS
- SYxS
- SQxS
- SMxS
- SDxS
- SHxS
- SWxS
- SCxS

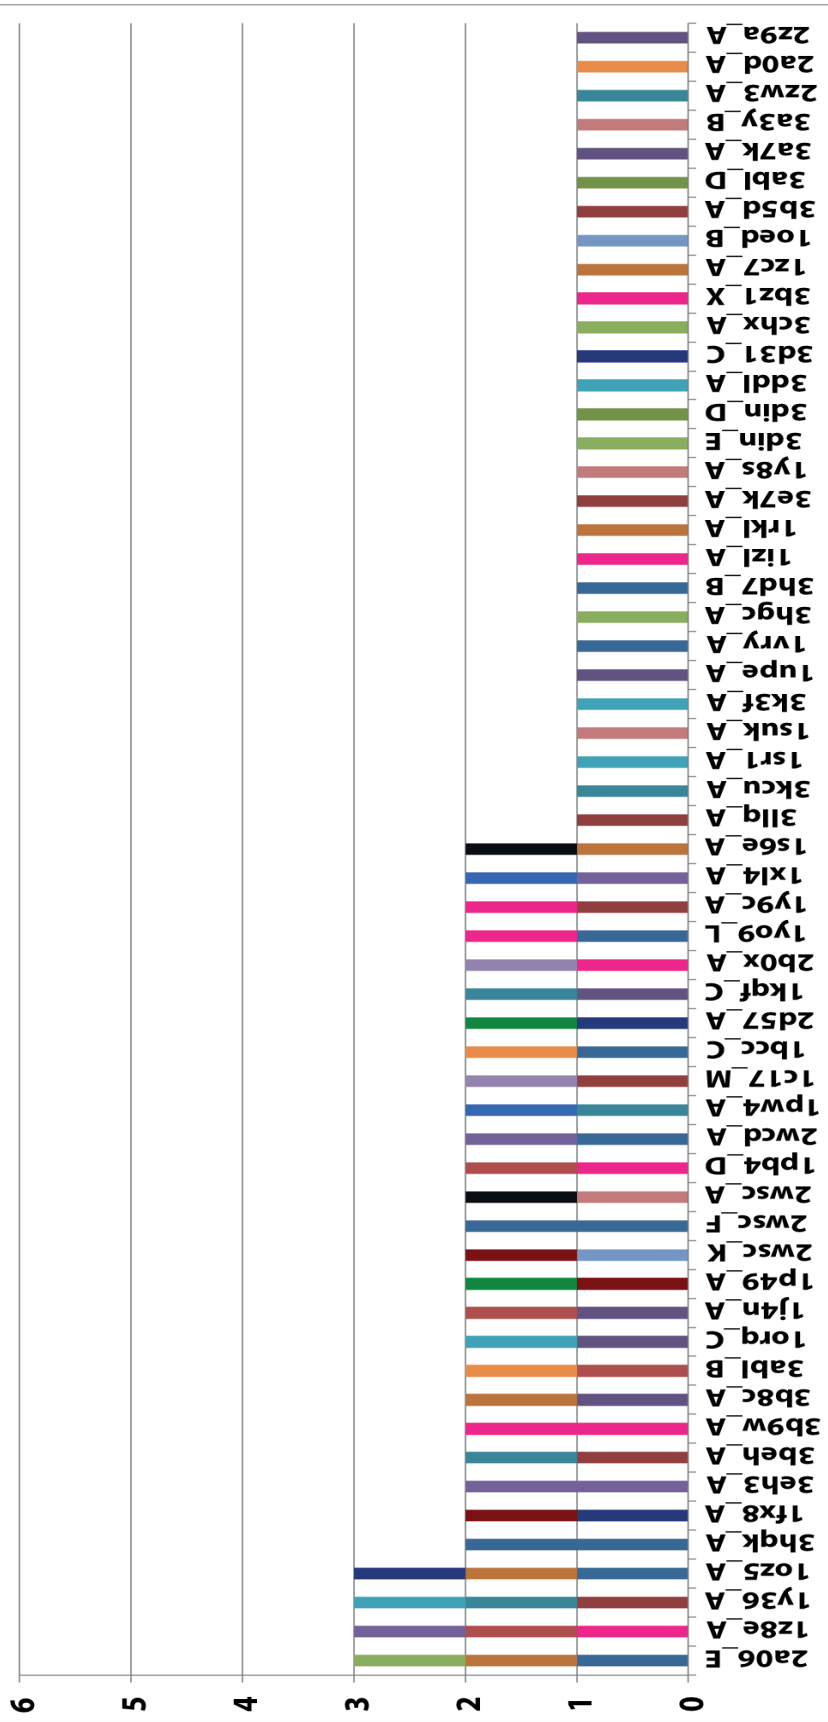

# Data- $\alpha$ SxxS Signatures

## -Part 3-

- SSxS ■ SLxS ■ SxS ■ SxS ■ SGxS ■ STxS ■ SVxS ■ SFXS ■ SKxS ■ SExS
- SRxS ■ SNxS ■ SPxS ■ SYxS ■ SQxS ■ SMxS ■ SDxS ■ SHxS ■ SWxS ■ SCxS

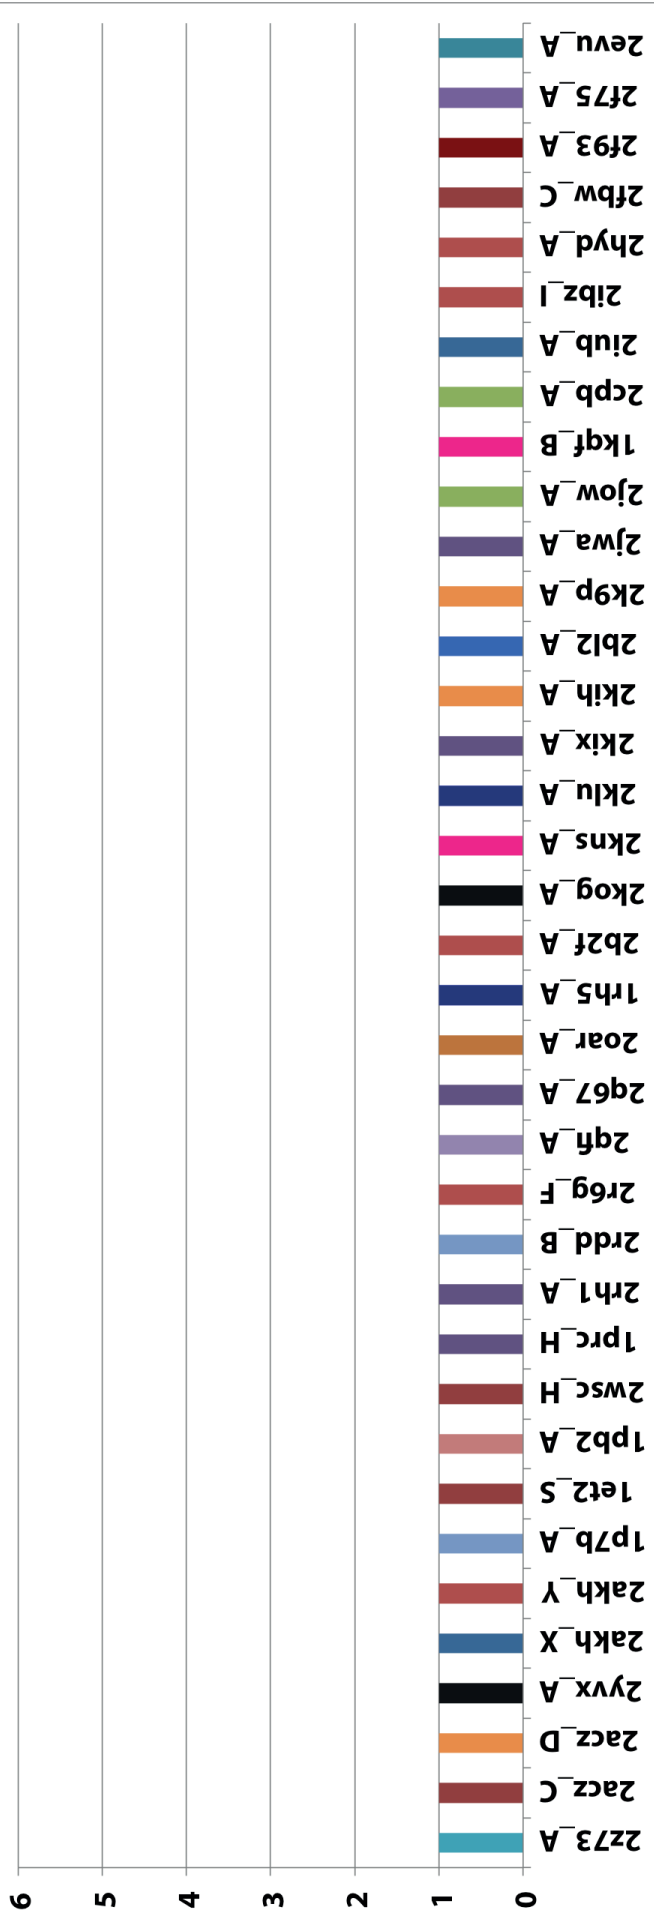

Figure S6-C

# Data- $\alpha$ , SxxT Signatures

## -Part 1-

- SAXT
- SCxT
- SDxT
- SExT
- SFxT
- SHxT
- SIxT
- SKxT
- SLxT
- SMxT
- SNxT
- SPxT
- SQxT
- SRxT
- SSxT
- STxT
- SVxT
- SWxT
- SYxT

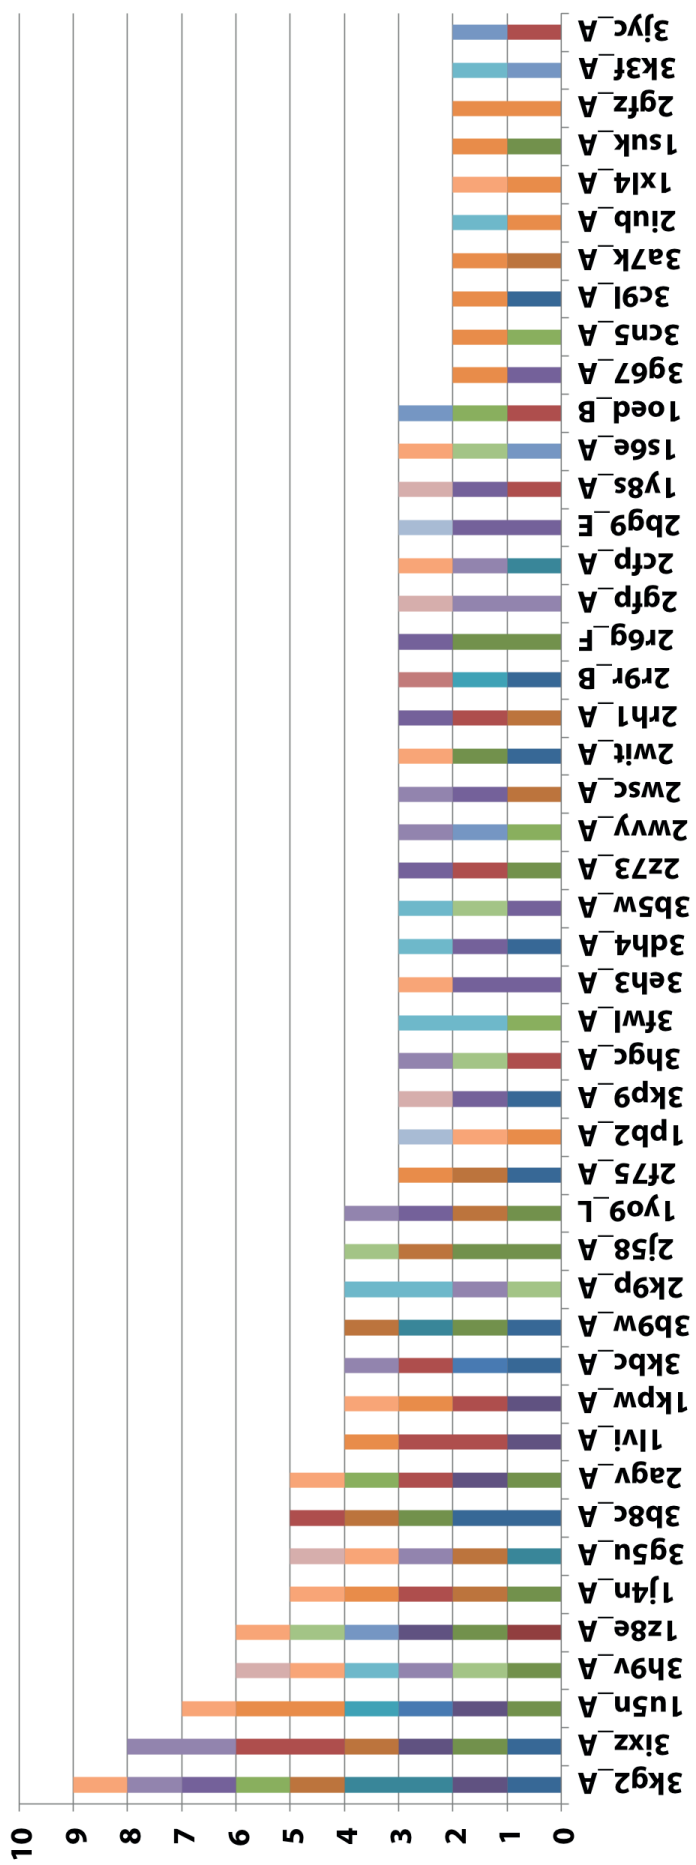

Figure S6-D

## Data- $\alpha$ , SxxT Signatures -Part 2-

- SAXT
- SCxT
- SDxT
- SExT
- SFxT
- SHxT
- SxT
- SKxT
- SLxT
- SMxT
- SNxT
- SPxT
- SQxT
- SRxT
- SSxT
- STxT
- SVxT
- SWxT
- SYxT

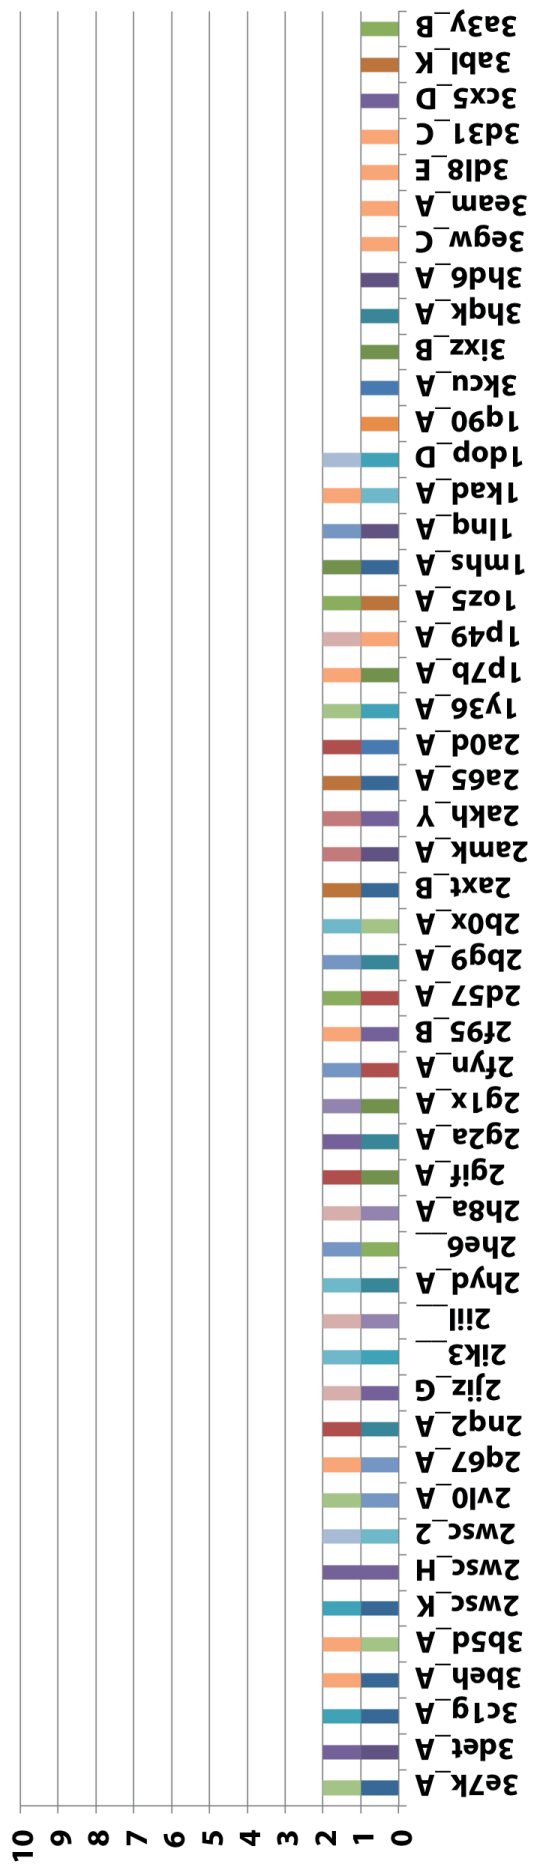

Figure S6-E

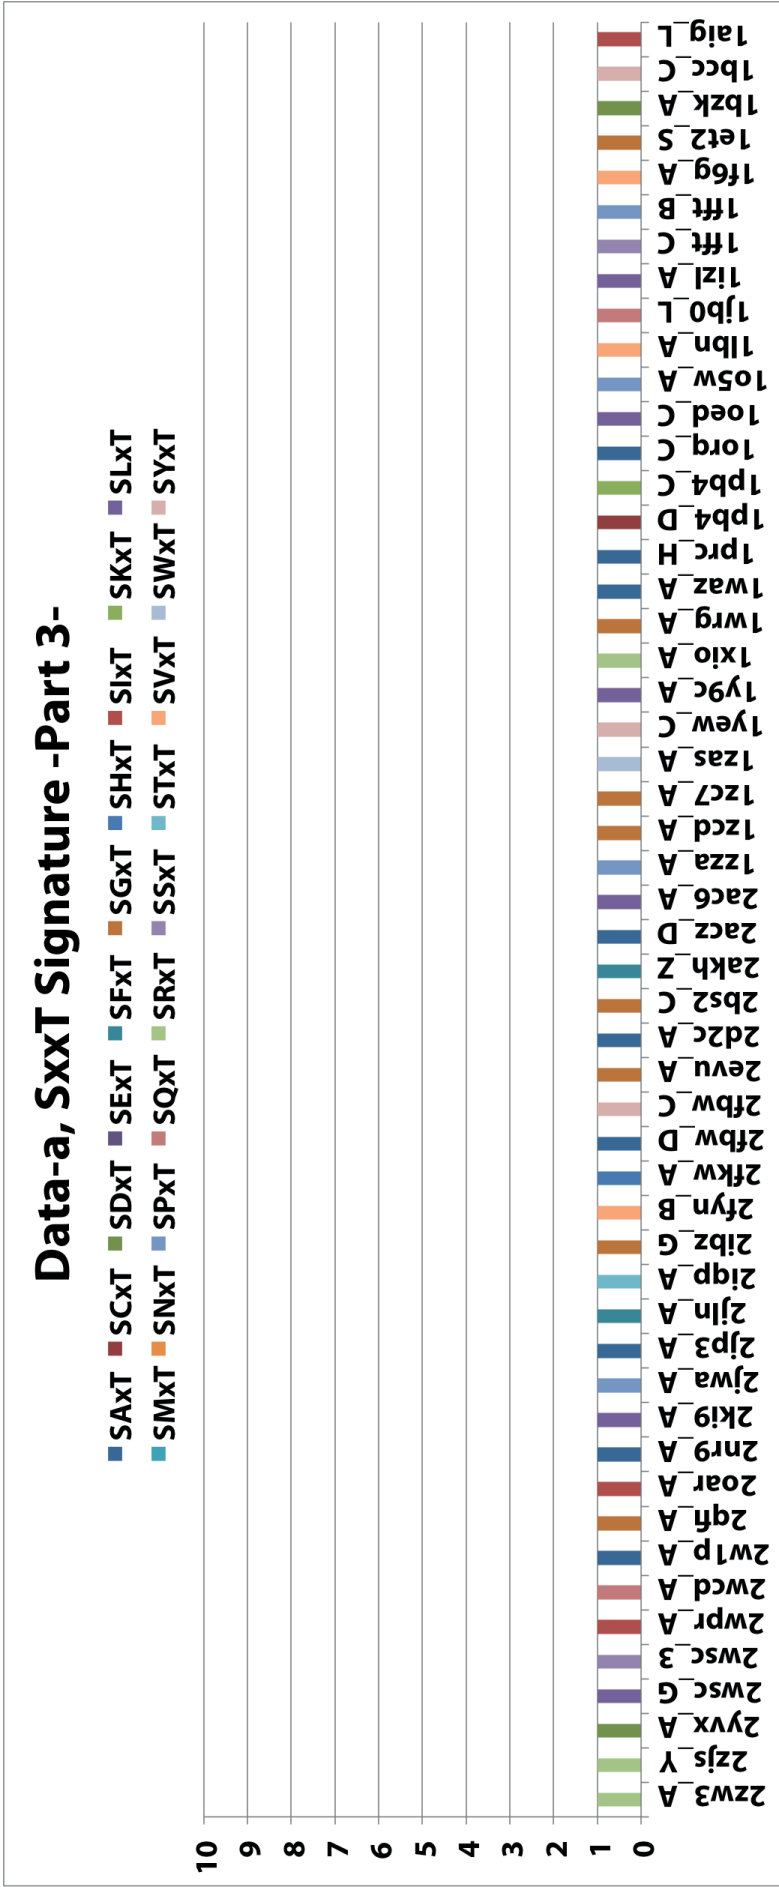

Figure S6-F







Figure S6-I

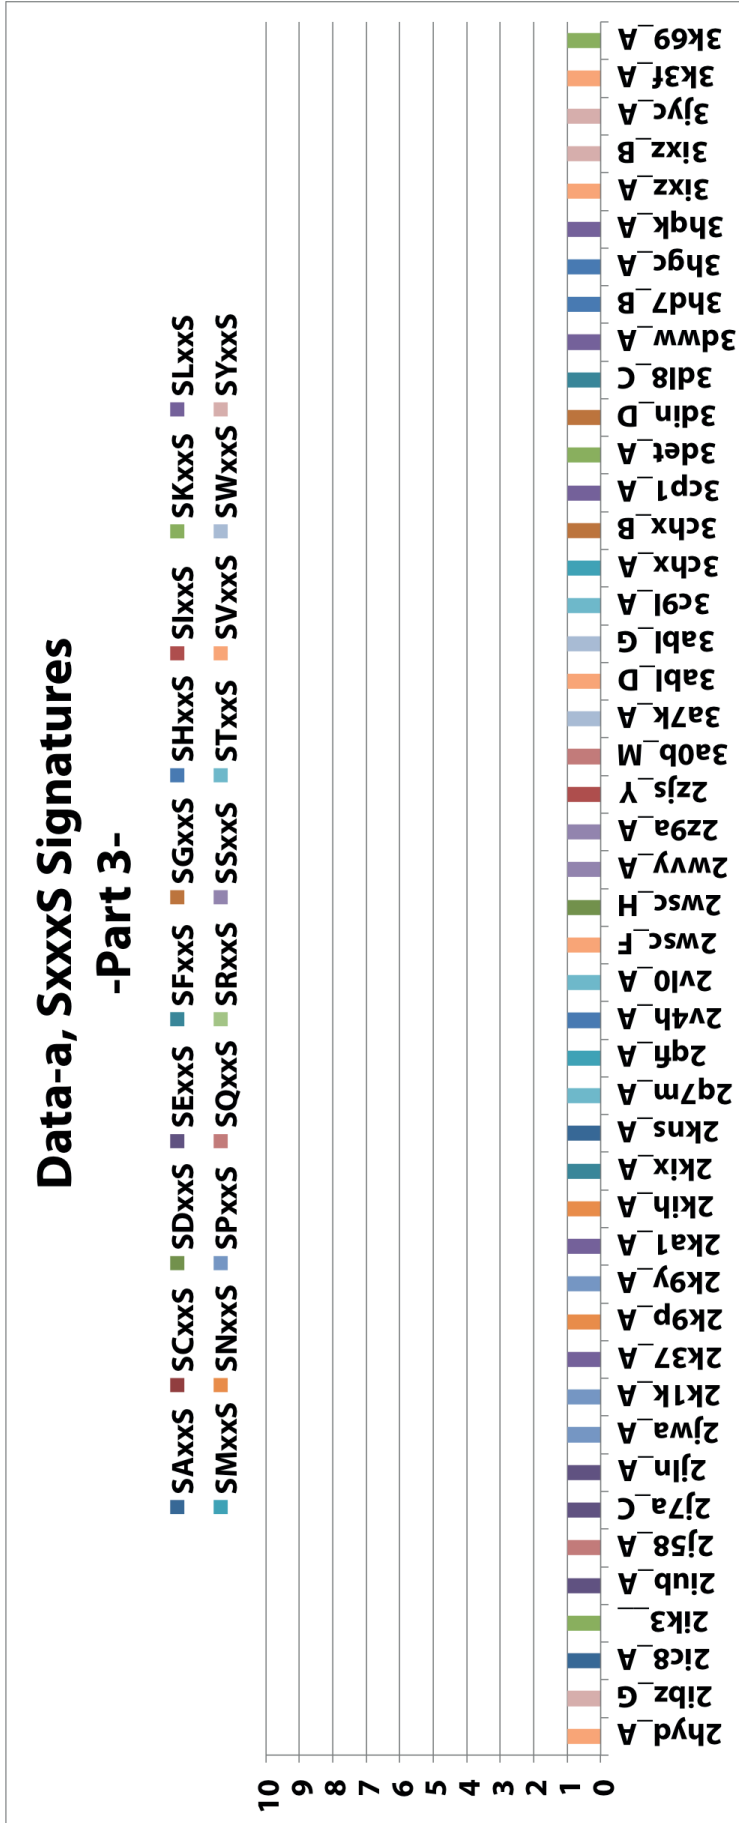

# Data- $\alpha$ , SxxxT Signatures

## -Part 1-

- SAxxT
- SCxxT
- SDxxT
- SExxT
- SFxxT
- SGxxT
- SHxxT
- SIxxT
- SKxxT
- SLxxT
- SMxxT
- SNxxT
- SPxxT
- SQxxT
- SRxxT
- STxxT
- SVxxT
- SWxxT
- SYxxT

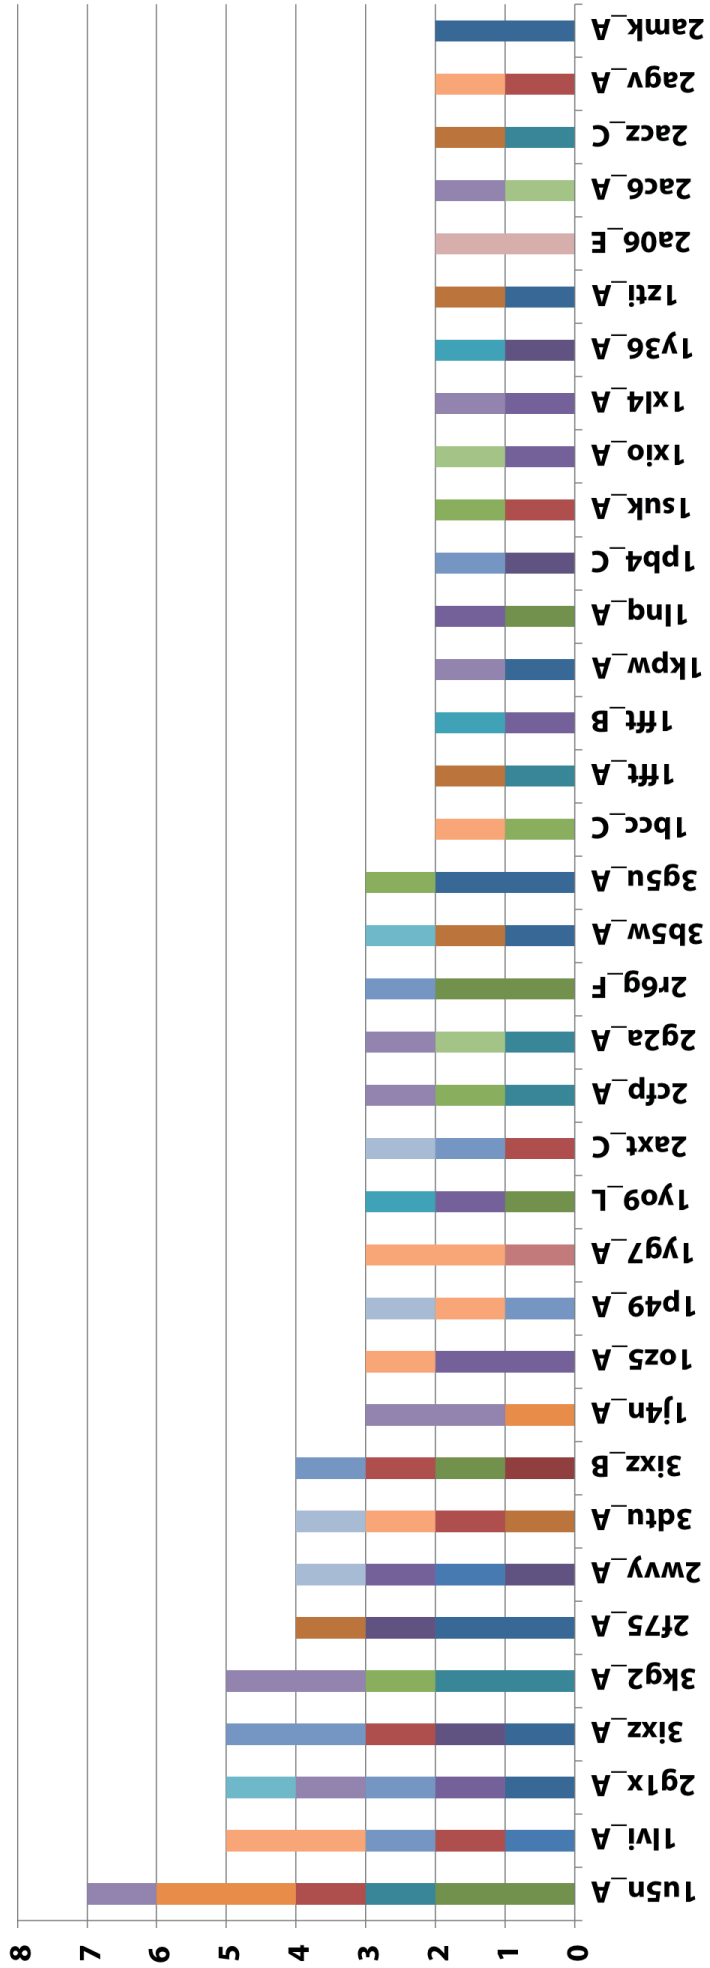

Figure S6-J

# Data- $\alpha$ , SxxxT Signatures

## -Part 2-

- SxxxT
- SCxxxT
- SDxxxT
- SExxxT
- SFxxxT
- SGxxxT
- SHxxxT
- SIxxxT
- SKxxxT
- SLxxxT
- SMxxxT
- SNxxxT
- SPxxxT
- SQxxxT
- SRxxxT
- SSxxxT
- STxxxT
- SVxxxT
- SWxxxT
- SYxxxT

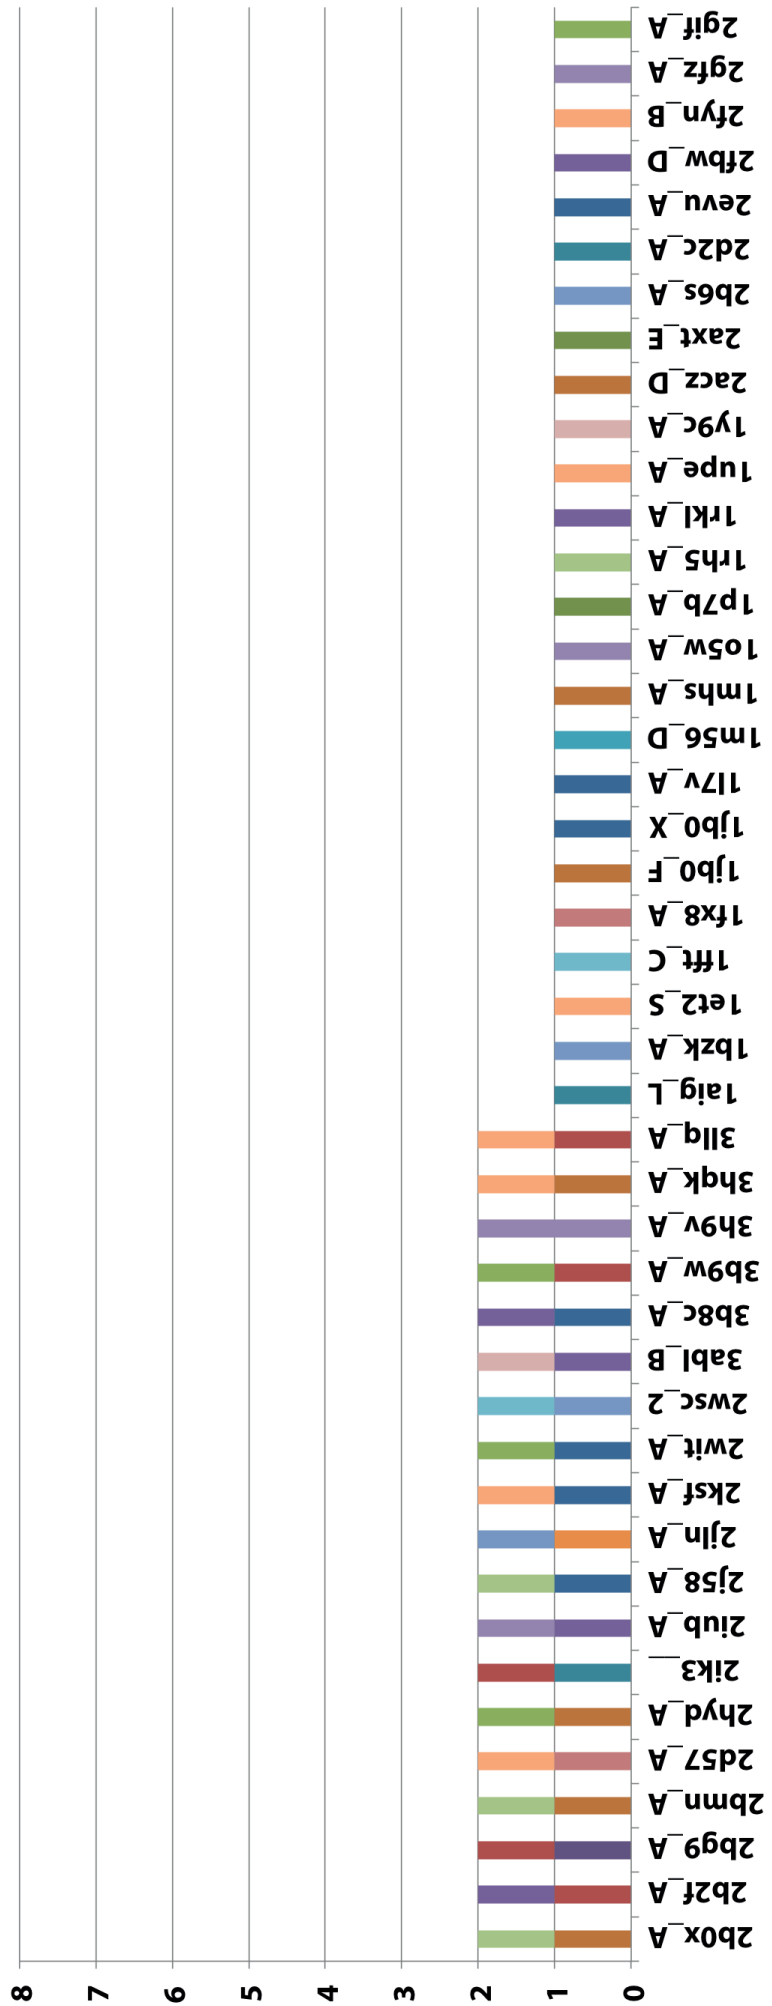

Figure S6-K

# Data- $\alpha$ , SxxxT Signatures

## -Part 3-

- SAxxT ■ SCxxT ■ SDxxT ■ SExxT ■ SFxxT ■ SGxxT ■ SHxxT ■ SIxxT ■ SKxxT ■ SLxxT
- SMxxT ■ SNxxT ■ SPxxT ■ SQxxT ■ SRxxT ■ SSxxT ■ STxxT ■ SVxxT ■ SWxxT ■ SYxxT

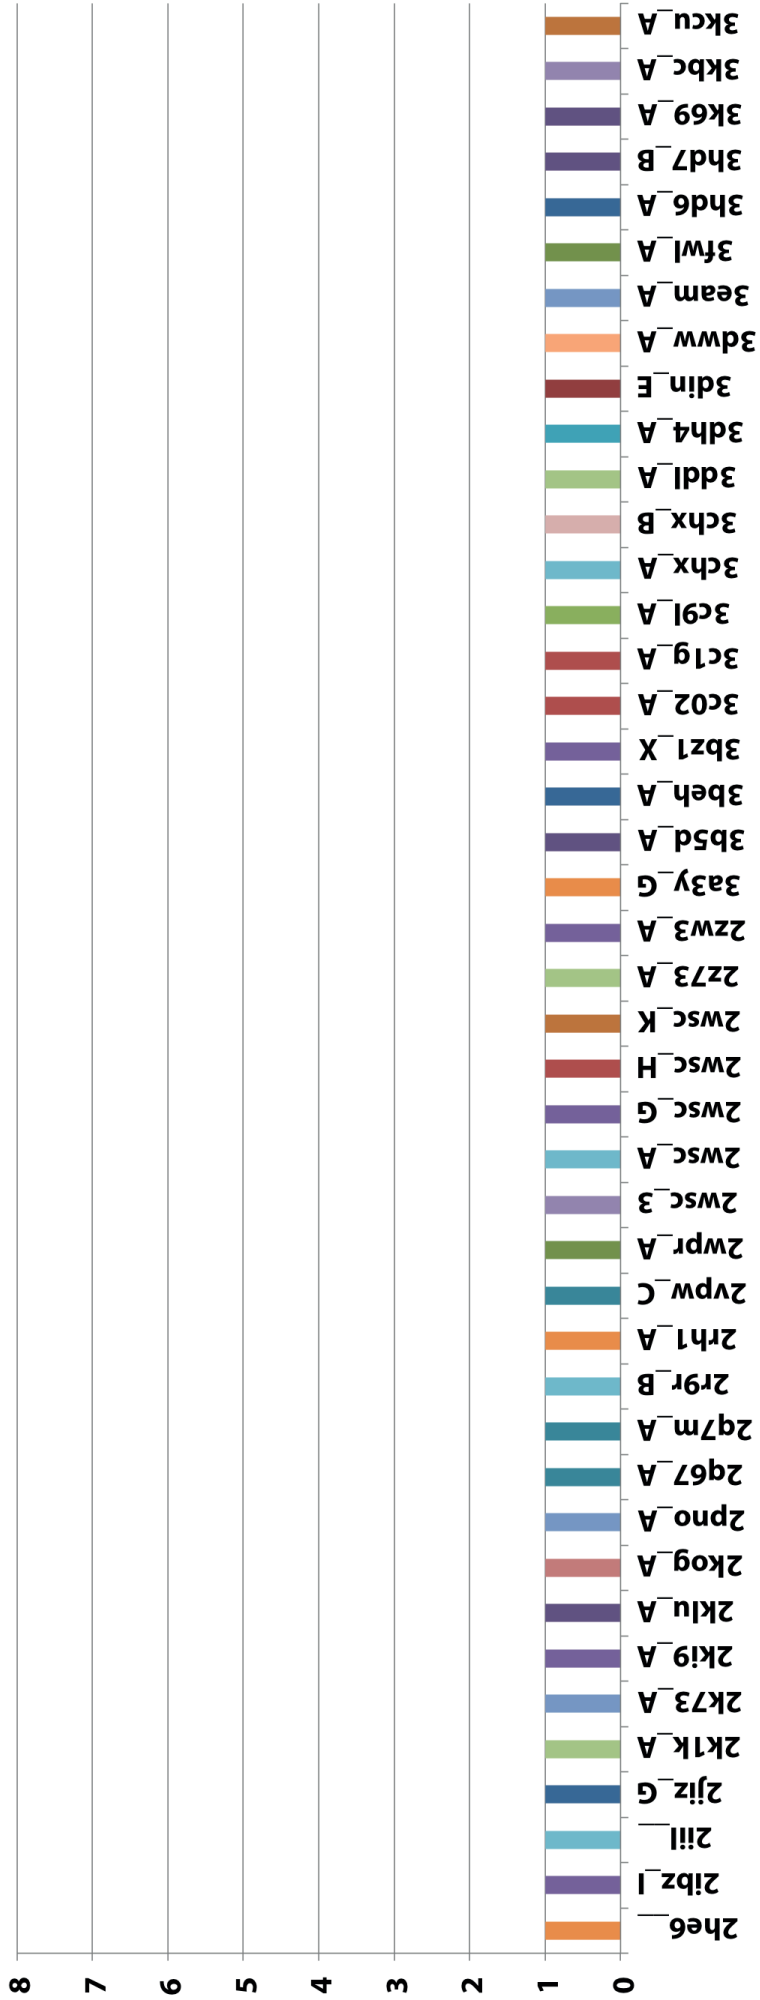

Figure S6-L











Figure S6-S

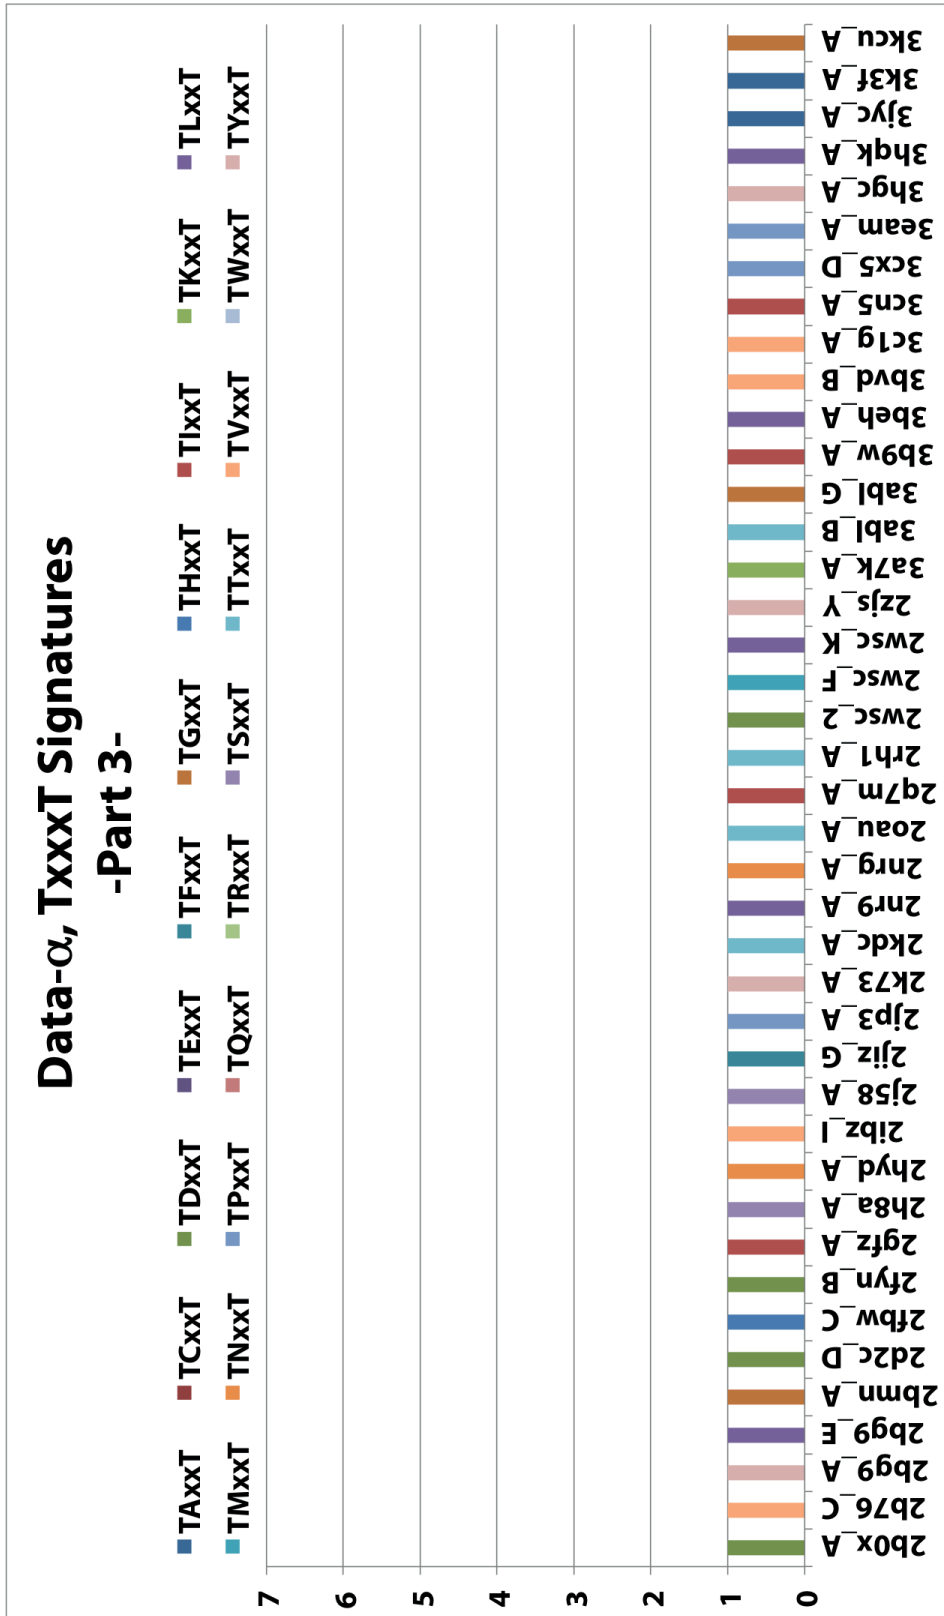













Figure S8-A

| Sequences | Cluster | TT | ST | SS | TxxT | TxxxT | SxxxT | SxxxS | SxxT | SxxS |
|-----------|---------|----|----|----|------|-------|-------|-------|------|------|
| 1a91_A    | 1       | 0  | 0  | 0  | 0    | 0     | 0     | 0     | 0    | 0    |
| 1afo_A    | 1       | 0  | 0  | 0  | 0    | 0     | 0     | 0     | 0    | 0    |
| 1aig_H    | 1       | 0  | 1  | 1  | 1    | 0     | 0     | 0     | 0    | 0    |
| 1aig_L    | 1       | 0  | 0  | 0  | 1    | 1     | 1     | 0     | 1    | 0    |
| 1ar1_B    | 1       | 0  | 0  | 1  | 4    | 0     | 0     | 0     | 0    | 0    |
| 1b9u_A    | 1       | 0  | 0  | 0  | 0    | 0     | 0     | 0     | 0    | 0    |
| 1ba4_A    | 1       | 0  | 0  | 0  | 0    | 0     | 0     | 0     | 0    | 0    |
| 1be3_K    | 1       | 0  | 0  | 0  | 0    | 0     | 0     | 1     | 0    | 0    |
| 1bzk_A    | 1       | 0  | 0  | 0  | 0    | 0     | 1     | 0     | 1    | 0    |
| 1c17_M    | 1       | 0  | 0  | 0  | 0    | 1     | 0     | 1     | 0    | 2    |
| 1c51_B    | 1       | 0  | 0  | 0  | 0    | 0     | 0     | 0     | 0    | 0    |
| 1dx7_A    | 1       | 0  | 0  | 0  | 1    | 0     | 0     | 1     | 0    | 0    |
| 1et2_S    | 1       | 0  | 1  | 1  | 4    | 1     | 1     | 0     | 1    | 1    |
| 1eys_M    | 1       | 0  | 0  | 0  | 1    | 1     | 0     | 1     | 0    | 0    |
| 1f6g_A    | 1       | 2  | 0  | 0  | 4    | 0     | 0     | 0     | 1    | 0    |
| 1fft_C    | 1       | 0  | 1  | 1  | 4    | 1     | 1     | 4     | 1    | 0    |
| 1fx8_A    | 1       | 2  | 2  | 0  | 1    | 0     | 1     | 0     | 0    | 2    |
| 1ijd_B    | 1       | 0  | 0  | 0  | 0    | 0     | 0     | 0     | 0    | 0    |
| 1izl_A    | 1       | 3  | 2  | 2  | 1    | 0     | 0     | 4     | 1    | 1    |
| 1jb0_F    | 1       | 1  | 0  | 0  | 0    | 0     | 1     | 0     | 0    | 0    |
| 1jb0_I    | 1       | 0  | 0  | 0  | 0    | 0     | 0     | 1     | 0    | 0    |
| 1jb0_K    | 1       | 2  | 0  | 0  | 1    | 1     | 0     | 0     | 0    | 0    |
| 1jb0_L    | 1       | 0  | 1  | 2  | 0    | 0     | 0     | 4     | 1    | 0    |
| 1jb0_M    | 1       | 0  | 1  | 0  | 0    | 0     | 0     | 0     | 0    | 0    |
| 1jb0_X    | 1       | 0  | 0  | 0  | 0    | 0     | 1     | 0     | 0    | 0    |
| 1jdm_A    | 1       | 0  | 0  | 0  | 0    | 0     | 0     | 0     | 0    | 0    |
| 1kqf_B    | 1       | 0  | 1  | 0  | 1    | 1     | 0     | 1     | 0    | 1    |
| 1kqf_C    | 1       | 0  | 0  | 0  | 1    | 0     | 0     | 0     | 0    | 2    |
| 1kyk_A    | 1       | 0  | 0  | 1  | 0    | 0     | 0     | 0     | 0    | 0    |



Figure S8-B

|        |   |   |   |   |   |   |   |   |   |   |
|--------|---|---|---|---|---|---|---|---|---|---|
| 1l7v_A | 1 | 0 | 2 | 0 | 0 | 0 | 1 | 0 | 0 | 0 |
| 1lbn_A | 1 | 0 | 0 | 0 | 0 | 0 | 0 | 1 | 1 | 0 |
| 1lgh_A | 1 | 0 | 1 | 0 | 0 | 0 | 0 | 0 | 0 | 0 |
| 1m0k_A | 1 | 2 | 2 | 0 | 0 | 0 | 0 | 1 | 0 | 0 |
| 1m56_D | 1 | 0 | 0 | 0 | 0 | 0 | 1 | 0 | 0 | 0 |
| 1nw0_A | 1 | 0 | 2 | 0 | 0 | 0 | 0 | 0 | 0 | 0 |
| 1oed_B | 1 | 1 | 0 | 0 | 0 | 1 | 0 | 4 | 3 | 1 |
| 1oed_C | 1 | 0 | 4 | 2 | 1 | 0 | 0 | 9 | 1 | 0 |
| 1orq_C | 1 | 1 | 0 | 1 | 1 | 0 | 0 | 4 | 1 | 2 |
| 1p7b_A | 1 | 1 | 1 | 3 | 1 | 0 | 1 | 4 | 2 | 1 |
| 1pb2_A | 1 | 2 | 1 | 1 | 1 | 1 | 0 | 9 | 3 | 1 |
| 1pb4_D | 1 | 2 | 1 | 1 | 0 | 1 | 0 | 1 | 1 | 2 |
| 1prc_H | 1 | 0 | 0 | 0 | 0 | 0 | 0 | 1 | 1 | 1 |
| 1pw4_A | 1 | 0 | 0 | 2 | 1 | 0 | 0 | 1 | 0 | 2 |
| 1q90_A | 1 | 0 | 0 | 0 | 0 | 0 | 0 | 0 | 1 | 0 |
| 1q90_L | 1 | 0 | 0 | 0 | 0 | 0 | 0 | 0 | 0 | 0 |
| 1q90_M | 1 | 0 | 0 | 0 | 1 | 0 | 0 | 0 | 0 | 0 |
| 1q90_N | 1 | 0 | 0 | 0 | 0 | 0 | 0 | 1 | 0 | 0 |
| 1qle_C | 1 | 1 | 0 | 0 | 0 | 1 | 0 | 0 | 0 | 0 |
| 1rh5_A | 1 | 1 | 1 | 2 | 1 | 0 | 1 | 1 | 0 | 1 |
| 1rh5_B | 1 | 1 | 0 | 0 | 0 | 0 | 0 | 0 | 0 | 0 |
| 1rh5_C | 1 | 0 | 0 | 0 | 0 | 1 | 0 | 0 | 0 | 0 |
| 1rkl_A | 1 | 0 | 1 | 0 | 0 | 0 | 1 | 0 | 0 | 1 |
| 1s6e_A | 1 | 0 | 2 | 0 | 1 | 0 | 0 | 4 | 3 | 2 |
| 1spf_A | 1 | 0 | 0 | 0 | 0 | 0 | 0 | 0 | 0 | 0 |
| 1sr1_A | 1 | 1 | 0 | 1 | 1 | 1 | 0 | 1 | 0 | 1 |
| 1upe_A | 1 | 0 | 2 | 2 | 1 | 0 | 1 | 4 | 0 | 1 |
| 1vry_A | 1 | 2 | 0 | 1 | 1 | 1 | 0 | 0 | 0 | 1 |
| 1waz_A | 1 | 0 | 0 | 0 | 0 | 0 | 0 | 0 | 1 | 0 |
| 1wrg_A | 1 | 0 | 0 | 1 | 0 | 0 | 0 | 0 | 1 | 0 |

Figure S8-C

|        |   |   |   |   |   |   |   |   |   |   |
|--------|---|---|---|---|---|---|---|---|---|---|
| 1xio_A | 1 | 2 | 1 | 1 | 4 | 0 | 2 | 0 | 1 | 0 |
| 1y8s_A | 1 | 0 | 3 | 1 | 4 | 1 | 0 | 0 | 3 | 1 |
| 1yew_C | 1 | 1 | 0 | 0 | 1 | 2 | 0 | 0 | 1 | 0 |
| 1zas_A | 1 | 0 | 0 | 0 | 0 | 0 | 0 | 1 | 1 | 0 |
| 1zc7_A | 1 | 0 | 2 | 1 | 4 | 1 | 0 | 0 | 1 | 1 |
| 1zza_A | 1 | 1 | 0 | 0 | 0 | 1 | 0 | 0 | 1 | 0 |
| 2a06_E | 1 | 2 | 1 | 3 | 1 | 1 | 2 | 9 | 0 | 3 |
| 2a06_G | 1 | 0 | 0 | 0 | 1 | 0 | 0 | 0 | 0 | 0 |
| 2a06_W | 1 | 0 | 1 | 0 | 0 | 1 | 0 | 0 | 0 | 0 |
| 2acz_C | 1 | 0 | 0 | 1 | 0 | 0 | 2 | 1 | 0 | 1 |
| 2acz_D | 1 | 0 | 0 | 0 | 0 | 1 | 1 | 0 | 1 | 1 |
| 2akh_X | 1 | 0 | 0 | 1 | 1 | 0 | 0 | 0 | 0 | 1 |
| 2akh_Y | 1 | 1 | 1 | 2 | 1 | 1 | 0 | 1 | 2 | 1 |
| 2akh_Z | 1 | 2 | 0 | 0 | 1 | 1 | 0 | 0 | 1 | 0 |
| 2aui_A | 1 | 0 | 0 | 0 | 0 | 0 | 0 | 1 | 0 | 0 |
| 2axt_E | 1 | 1 | 1 | 0 | 0 | 0 | 1 | 0 | 0 | 0 |
| 2axt_F | 1 | 0 | 0 | 0 | 1 | 0 | 0 | 0 | 0 | 0 |
| 2axt_H | 1 | 1 | 1 | 0 | 0 | 0 | 0 | 0 | 0 | 0 |
| 2axt_I | 1 | 0 | 0 | 0 | 0 | 1 | 0 | 0 | 0 | 0 |
| 2axt_K | 1 | 0 | 0 | 0 | 0 | 0 | 0 | 0 | 0 | 0 |
| 2axt_T | 1 | 0 | 0 | 0 | 0 | 0 | 0 | 0 | 0 | 0 |
| 2b0x_A | 1 | 1 | 2 | 2 | 1 | 1 | 2 | 4 | 2 | 2 |
| 2b2f_A | 1 | 1 | 2 | 3 | 0 | 0 | 2 | 0 | 0 | 1 |
| 2b6s_A | 1 | 0 | 2 | 1 | 0 | 0 | 1 | 4 | 0 | 0 |
| 2b76_C | 1 | 1 | 1 | 0 | 0 | 1 | 0 | 0 | 0 | 0 |
| 2b76_D | 1 | 0 | 0 | 0 | 1 | 0 | 0 | 0 | 0 | 0 |
| 2bg9_E | 1 | 1 | 2 | 1 | 1 | 1 | 0 | 1 | 3 | 0 |
| 2bl2_A | 1 | 1 | 0 | 0 | 0 | 0 | 0 | 1 | 0 | 1 |
| 2c3e_A | 1 | 0 | 0 | 0 | 0 | 0 | 0 | 1 | 0 | 0 |
| 2cpb_A | 1 | 0 | 0 | 0 | 0 | 0 | 0 | 1 | 0 | 1 |

Figure S8-D

|        |   |   |   |   |   |   |   |   |   |   |
|--------|---|---|---|---|---|---|---|---|---|---|
| 2d2c_A | 1 | 0 | 0 | 1 | 0 | 0 | 1 | 0 | 1 | 0 |
| 2d2c_B | 1 | 1 | 0 | 0 | 1 | 0 | 0 | 0 | 0 | 0 |
| 2d2c_D | 1 | 1 | 0 | 0 | 1 | 1 | 0 | 0 | 0 | 0 |
| 2d2c_E | 1 | 0 | 0 | 0 | 0 | 0 | 0 | 0 | 0 | 0 |
| 2d2c_F | 1 | 0 | 0 | 0 | 0 | 0 | 0 | 0 | 0 | 0 |
| 2d2c_G | 1 | 0 | 0 | 0 | 0 | 0 | 0 | 0 | 0 | 0 |
| 2d57_A | 1 | 1 | 1 | 2 | 1 | 0 | 2 | 1 | 2 | 2 |
| 2dyr_I | 1 | 0 | 1 | 0 | 0 | 0 | 0 | 0 | 0 | 0 |
| 2evu_A | 1 | 1 | 0 | 1 | 0 | 0 | 1 | 1 | 1 | 1 |
| 2f93_A | 1 | 2 | 0 | 1 | 1 | 0 | 0 | 1 | 0 | 1 |
| 2f95_B | 1 | 0 | 1 | 0 | 0 | 0 | 0 | 1 | 2 | 0 |
| 2fbw_C | 1 | 1 | 0 | 2 | 0 | 1 | 0 | 9 | 1 | 1 |
| 2fbw_D | 1 | 0 | 0 | 1 | 0 | 0 | 1 | 1 | 1 | 0 |
| 2fkw_A | 1 | 1 | 0 | 0 | 0 | 0 | 0 | 0 | 1 | 0 |
| 2fyn_A | 1 | 1 | 1 | 0 | 4 | 0 | 0 | 4 | 2 | 0 |
| 2fyn_B | 1 | 1 | 0 | 0 | 1 | 1 | 1 | 0 | 1 | 0 |
| 2fyn_C | 1 | 1 | 0 | 1 | 0 | 0 | 0 | 1 | 0 | 0 |
| 2h8a_A | 1 | 0 | 1 | 1 | 0 | 1 | 0 | 0 | 2 | 0 |
| 2hac_A | 1 | 0 | 0 | 0 | 0 | 0 | 0 | 0 | 0 | 0 |
| 2ibz_G | 1 | 0 | 0 | 0 | 0 | 0 | 0 | 1 | 1 | 0 |
| 2ibz_I | 1 | 0 | 0 | 1 | 1 | 1 | 1 | 0 | 0 | 1 |
| 2ic8_A | 1 | 0 | 0 | 0 | 0 | 0 | 0 | 1 | 0 | 0 |
| 2j7a_C | 1 | 0 | 1 | 0 | 0 | 0 | 0 | 1 | 0 | 0 |
| 2jo1_A | 1 | 0 | 1 | 1 | 0 | 0 | 0 | 0 | 0 | 0 |
| 2jow_A | 1 | 0 | 0 | 0 | 1 | 0 | 0 | 0 | 0 | 1 |
| 2jp3_A | 1 | 0 | 1 | 1 | 0 | 1 | 0 | 0 | 1 | 0 |
| 2jwa_A | 1 | 0 | 0 | 0 | 0 | 0 | 0 | 1 | 1 | 1 |
| 2k1k_A | 1 | 0 | 0 | 0 | 0 | 0 | 1 | 1 | 0 | 0 |
| 2k37_A | 1 | 0 | 0 | 0 | 0 | 0 | 0 | 1 | 0 | 0 |
| 2k73_A | 1 | 0 | 0 | 0 | 0 | 1 | 1 | 0 | 0 | 0 |



Figure S8-F

|        |   |   |   |   |   |   |   |   |   |   |   |
|--------|---|---|---|---|---|---|---|---|---|---|---|
| 2w83_C | 1 | 0 | 0 | 0 | 0 | 0 | 0 | 0 | 0 | 0 | 0 |
| 2wgm_A | 1 | 0 | 2 | 0 | 0 | 0 | 0 | 0 | 0 | 0 | 0 |
| 2wsc_1 | 1 | 0 | 0 | 2 | 1 | 0 | 0 | 4 | 0 | 3 |   |
| 2wsc_H | 1 | 2 | 0 | 1 | 0 | 0 | 1 | 1 | 2 | 1 |   |
| 2wsc_I | 1 | 0 | 1 | 0 | 0 | 0 | 0 | 0 | 0 | 0 |   |
| 2wsc_J | 1 | 0 | 1 | 0 | 0 | 0 | 0 | 0 | 0 | 0 |   |
| 2wsc_K | 1 | 3 | 1 | 2 | 1 | 1 | 1 | 4 | 2 | 2 |   |
| 2yvx_A | 1 | 0 | 0 | 3 | 0 | 2 | 0 | 0 | 1 | 1 |   |
| 2z73_A | 1 | 1 | 1 | 1 | 0 | 0 | 1 | 4 | 3 | 1 |   |
| 2z9a_A | 1 | 0 | 0 | 1 | 0 | 0 | 0 | 1 | 0 | 1 |   |
| 2zjs_E | 1 | 0 | 0 | 0 | 1 | 0 | 0 | 0 | 0 | 0 |   |
| 2zjs_Y | 1 | 0 | 0 | 0 | 0 | 1 | 0 | 1 | 1 | 0 |   |
| 2zw3_A | 1 | 0 | 2 | 1 | 4 | 0 | 1 | 0 | 1 | 1 |   |
| 3a0b_J | 1 | 0 | 0 | 1 | 0 | 0 | 0 | 0 | 0 | 0 |   |
| 3a0b_L | 1 | 0 | 0 | 1 | 0 | 0 | 0 | 0 | 0 | 0 |   |
| 3a0b_M | 1 | 0 | 0 | 1 | 0 | 0 | 0 | 1 | 0 | 0 |   |
| 3a0b_Z | 1 | 0 | 0 | 0 | 0 | 0 | 0 | 0 | 0 | 0 |   |
| 3a3y_B | 1 | 2 | 0 | 2 | 1 | 0 | 0 | 4 | 1 | 1 |   |
| 3a3y_G | 1 | 0 | 0 | 0 | 0 | 0 | 1 | 0 | 0 | 0 |   |
| 3a7k_A | 1 | 1 | 3 | 3 | 1 | 1 | 0 | 1 | 2 | 1 |   |
| 3abl_B | 1 | 2 | 1 | 3 | 9 | 1 | 2 | 0 | 0 | 2 |   |
| 3abl_D | 1 | 0 | 1 | 1 | 0 | 0 | 0 | 1 | 0 | 1 |   |
| 3abl_G | 1 | 0 | 0 | 0 | 0 | 1 | 0 | 1 | 0 | 0 |   |
| 3abl_J | 1 | 0 | 0 | 0 | 0 | 0 | 0 | 0 | 0 | 0 |   |
| 3abl_K | 1 | 0 | 0 | 0 | 0 | 0 | 0 | 0 | 1 | 0 |   |
| 3abl_L | 1 | 0 | 0 | 0 | 0 | 0 | 0 | 0 | 0 | 0 |   |
| 3abl_M | 1 | 0 | 0 | 1 | 0 | 0 | 0 | 0 | 0 | 0 |   |
| 3b4r_A | 1 | 0 | 1 | 0 | 0 | 0 | 0 | 0 | 0 | 0 |   |
| 3b5d_A | 1 | 1 | 1 | 0 | 0 | 0 | 1 | 0 | 2 | 1 |   |
| 3beh_A | 1 | 3 | 2 | 2 | 1 | 1 | 1 | 4 | 2 | 2 |   |

Figure S8-G

|        |   |   |   |   |   |   |   |    |   |   |
|--------|---|---|---|---|---|---|---|----|---|---|
| 3bvd_B | 1 | 1 | 1 | 0 | 1 | 1 | 0 | 0  | 0 | 0 |
| 3bvd_C | 1 | 0 | 0 | 0 | 0 | 0 | 0 | 0  | 0 | 0 |
| 3bz1_X | 1 | 0 | 0 | 1 | 0 | 0 | 1 | 0  | 0 | 1 |
| 3bz1_y | 1 | 0 | 0 | 0 | 0 | 0 | 0 | 0  | 0 | 0 |
| 3c02_A | 1 | 1 | 1 | 2 | 0 | 0 | 1 | 16 | 0 | 0 |
| 3c1g_A | 1 | 0 | 0 | 1 | 1 | 1 | 1 | 0  | 2 | 0 |
| 3chx_B | 1 | 2 | 1 | 0 | 1 | 0 | 1 | 1  | 0 | 0 |
| 3cn5_A | 1 | 0 | 0 | 1 | 1 | 1 | 0 | 4  | 2 | 0 |
| 3cp1_A | 1 | 0 | 0 | 0 | 0 | 0 | 0 | 1  | 0 | 0 |
| 3cx5_D | 1 | 2 | 0 | 1 | 1 | 1 | 0 | 0  | 1 | 0 |
| 3d31_C | 1 | 0 | 0 | 2 | 0 | 0 | 0 | 9  | 1 | 1 |
| 3ddl_A | 1 | 0 | 2 | 2 | 4 | 0 | 1 | 4  | 0 | 1 |
| 3dhw_A | 1 | 0 | 0 | 0 | 1 | 2 | 0 | 0  | 0 | 0 |
| 3din_D | 1 | 0 | 0 | 0 | 0 | 0 | 0 | 1  | 0 | 1 |
| 3din_E | 1 | 0 | 0 | 0 | 0 | 0 | 1 | 0  | 0 | 1 |
| 3dl8_C | 1 | 0 | 0 | 0 | 0 | 0 | 0 | 1  | 0 | 0 |
| 3dl8_E | 1 | 1 | 1 | 0 | 1 | 0 | 0 | 0  | 1 | 0 |
| 3dww_A | 1 | 0 | 1 | 1 | 0 | 0 | 1 | 1  | 0 | 0 |
| 3e7k_A | 1 | 0 | 0 | 0 | 1 | 0 | 0 | 0  | 2 | 1 |
| 3eam_A | 1 | 0 | 2 | 0 | 1 | 1 | 1 | 0  | 1 | 0 |
| 3egw_C | 1 | 2 | 0 | 1 | 0 | 0 | 0 | 0  | 1 | 0 |
| 3eh3_A | 1 | 0 | 2 | 0 | 1 | 2 | 0 | 4  | 3 | 2 |
| 3fh6_G | 1 | 1 | 1 | 1 | 0 | 0 | 0 | 0  | 0 | 0 |
| 3hd7_B | 1 | 0 | 1 | 1 | 0 | 0 | 1 | 1  | 0 | 1 |
| 3hgc_A | 1 | 1 | 1 | 2 | 4 | 1 | 0 | 1  | 3 | 1 |
| 3jyc_A | 1 | 3 | 1 | 1 | 4 | 1 | 0 | 1  | 2 | 0 |
| 3k3f_A | 1 | 2 | 2 | 0 | 1 | 1 | 0 | 1  | 2 | 1 |
| 3k69_A | 1 | 0 | 0 | 0 | 0 | 2 | 1 | 1  | 0 | 0 |
| 3kcu_A | 1 | 1 | 1 | 0 | 1 | 1 | 1 | 0  | 1 | 1 |
| 3llq_A | 1 | 0 | 2 | 1 | 1 | 0 | 2 | 0  | 0 | 1 |

Figure S8-H

|        |   |   |   |   |    |   |   |    |   |   |
|--------|---|---|---|---|----|---|---|----|---|---|
| 1dop_D | 2 | 1 | 1 | 1 | 4  | 2 | 0 | 1  | 2 | 0 |
| 1fft_A | 2 | 2 | 1 | 1 | 1  | 2 | 2 | 1  | 0 | 0 |
| 1kad_A | 2 | 1 | 4 | 0 | 4  | 3 | 0 | 4  | 2 | 0 |
| 1o5w_A | 2 | 0 | 1 | 1 | 0  | 3 | 1 | 1  | 1 | 0 |
| 1suk_A | 2 | 3 | 1 | 1 | 4  | 3 | 2 | 4  | 2 | 1 |
| 2a0d_A | 2 | 2 | 4 | 5 | 0  | 3 | 0 | 4  | 2 | 1 |
| 2a65_A | 2 | 1 | 0 | 1 | 4  | 3 | 0 | 0  | 2 | 0 |
| 2bs2_C | 2 | 1 | 1 | 2 | 1  | 2 | 0 | 1  | 1 | 0 |
| 2gfp_A | 2 | 1 | 1 | 2 | 0  | 2 | 0 | 1  | 3 | 0 |
| 2hyd_A | 2 | 3 | 2 | 0 | 4  | 1 | 2 | 1  | 2 | 1 |
| 2iub_A | 2 | 1 | 1 | 3 | 1  | 3 | 2 | 1  | 2 | 1 |
| 2j58_A | 2 | 3 | 1 | 0 | 0  | 1 | 2 | 1  | 4 | 0 |
| 2jln_A | 2 | 1 | 4 | 1 | 16 | 2 | 2 | 1  | 1 | 0 |
| 2r6g_F | 2 | 6 | 1 | 3 | 4  | 4 | 3 | 0  | 3 | 1 |
| 2vl0_A | 2 | 1 | 1 | 1 | 1  | 2 | 0 | 1  | 2 | 0 |
| 2wpr_A | 2 | 4 | 0 | 0 | 4  | 2 | 1 | 0  | 1 | 0 |
| 2wsc_A | 2 | 6 | 1 | 3 | 4  | 3 | 1 | 4  | 3 | 2 |
| 3c9l_A | 2 | 5 | 1 | 0 | 1  | 3 | 1 | 1  | 2 | 0 |
| 3chx_A | 2 | 2 | 2 | 1 | 9  | 2 | 1 | 1  | 0 | 1 |
| 3det_A | 2 | 1 | 1 | 1 | 0  | 2 | 0 | 1  | 2 | 0 |
| 3h9v_A | 2 | 2 | 1 | 3 | 1  | 3 | 2 | 4  | 6 | 0 |
| 3kbc_A | 2 | 0 | 0 | 2 | 0  | 4 | 1 | 0  | 4 | 0 |
| 3kp9_A | 2 | 2 | 0 | 1 | 4  | 3 | 0 | 0  | 3 | 0 |
| 1fft_B | 3 | 1 | 0 | 0 | 1  | 1 | 2 | 25 | 1 | 0 |
| 1j4n_A | 3 | 2 | 0 | 3 | 0  | 0 | 3 | 9  | 5 | 2 |
| 1lnq_A | 3 | 0 | 3 | 0 | 1  | 0 | 2 | 1  | 2 | 0 |
| 1lvi_A | 3 | 0 | 2 | 2 | 1  | 1 | 5 | 9  | 4 | 4 |
| 1p49_A | 3 | 1 | 3 | 3 | 4  | 2 | 3 | 4  | 2 | 2 |
| 1pb4_C | 3 | 1 | 0 | 1 | 0  | 1 | 2 | 1  | 1 | 0 |
| 1xl4_A | 3 | 1 | 0 | 2 | 25 | 0 | 2 | 4  | 2 | 2 |

Figure S8-I

|        |   |   |   |   |    |   |   |    |   |   |
|--------|---|---|---|---|----|---|---|----|---|---|
| 1y36_A | 3 | 2 | 2 | 3 | 0  | 3 | 2 | 1  | 2 | 3 |
| 1yg7_A | 3 | 0 | 0 | 1 | 1  | 1 | 3 | 9  | 0 | 0 |
| 1yo9_L | 3 | 1 | 0 | 5 | 1  | 0 | 3 | 9  | 4 | 2 |
| 1zti_A | 3 | 1 | 2 | 4 | 9  | 2 | 2 | 9  | 0 | 4 |
| 2ac6_A | 3 | 0 | 3 | 4 | 4  | 1 | 2 | 9  | 1 | 3 |
| 2bg9_A | 3 | 0 | 3 | 3 | 0  | 1 | 2 | 4  | 2 | 3 |
| 2bmn_A | 3 | 1 | 0 | 1 | 1  | 1 | 2 | 0  | 0 | 0 |
| 2cfp_A | 3 | 1 | 0 | 2 | 0  | 0 | 3 | 1  | 3 | 3 |
| 2f75_A | 3 | 1 | 1 | 5 | 1  | 0 | 4 | 9  | 3 | 1 |
| 2g2a_A | 3 | 0 | 0 | 5 | 0  | 0 | 3 | 1  | 2 | 0 |
| 2iil__ | 3 | 1 | 3 | 2 | 1  | 2 | 1 | 9  | 2 | 3 |
| 2ik3__ | 3 | 2 | 3 | 1 | 1  | 2 | 2 | 1  | 2 | 3 |
| 2wsc_2 | 3 | 2 | 5 | 3 | 4  | 1 | 2 | 25 | 2 | 3 |
| 2wvy_A | 3 | 0 | 1 | 3 | 9  | 0 | 4 | 1  | 3 | 3 |
| 3b9w_A | 3 | 3 | 0 | 0 | 16 | 1 | 2 | 4  | 4 | 2 |
| 3dtu_A | 3 | 2 | 3 | 2 | 0  | 2 | 4 | 9  | 0 | 4 |
| 3hqk_A | 3 | 1 | 2 | 4 | 0  | 1 | 2 | 1  | 1 | 2 |
| 3ixz_B | 3 | 1 | 2 | 0 | 0  | 0 | 4 | 1  | 1 | 0 |
| 1bcc_C | 4 | 0 | 0 | 2 | 16 | 3 | 2 | 1  | 1 | 2 |
| 1mhs_A | 4 | 3 | 2 | 4 | 9  | 3 | 1 | 9  | 2 | 4 |
| 1y9c_A | 4 | 1 | 1 | 0 | 1  | 4 | 1 | 4  | 1 | 2 |
| 1z8e_A | 4 | 2 | 3 | 2 | 1  | 2 | 0 | 4  | 6 | 3 |
| 1zcd_A | 4 | 1 | 0 | 2 | 0  | 0 | 0 | 4  | 1 | 4 |
| 2axt_B | 4 | 2 | 0 | 3 | 1  | 1 | 0 | 0  | 2 | 3 |
| 2axt_C | 4 | 2 | 0 | 5 | 1  | 0 | 3 | 0  | 0 | 4 |
| 2gfz_A | 4 | 0 | 3 | 2 | 1  | 1 | 1 | 9  | 2 | 4 |
| 2iqp_A | 4 | 0 | 1 | 2 | 0  | 2 | 0 | 4  | 1 | 3 |
| 2jiz_G | 4 | 1 | 1 | 3 | 0  | 1 | 1 | 9  | 2 | 3 |
| 2r9r_B | 4 | 2 | 4 | 5 | 9  | 4 | 1 | 4  | 3 | 4 |
| 2wcd_A | 4 | 3 | 0 | 2 | 1  | 3 | 0 | 9  | 1 | 2 |



Figure S8-J

|        |    |   |   |    |    |   |   |    |   |   |
|--------|----|---|---|----|----|---|---|----|---|---|
| 2wit_A | 4  | 2 | 4 | 2  | 0  | 4 | 2 | 9  | 3 | 4 |
| 2wsc_3 | 4  | 0 | 0 | 3  | 0  | 0 | 1 | 4  | 1 | 3 |
| 2wsc_F | 4  | 0 | 0 | 6  | 1  | 1 | 0 | 1  | 0 | 2 |
| 3b8c_A | 4  | 1 | 3 | 2  | 9  | 3 | 2 | 16 | 5 | 2 |
| 3dh4_A | 4  | 2 | 2 | 2  | 1  | 2 | 1 | 9  | 3 | 5 |
| 3fwl_A | 4  | 2 | 2 | 2  | 9  | 3 | 1 | 16 | 3 | 3 |
| 3g67_A | 4  | 0 | 0 | 2  | 0  | 2 | 0 | 4  | 2 | 3 |
| 3gi8_C | 4  | 0 | 1 | 2  | 1  | 0 | 0 | 4  | 0 | 5 |
| 3hd6_A | 4  | 0 | 2 | 3  | 4  | 0 | 1 | 4  | 1 | 3 |
| 1kpw_A | 5  | 0 | 4 | 5  | 0  | 1 | 2 | 9  | 4 | 5 |
| 1oz5_A | 5  | 2 | 3 | 8  | 1  | 0 | 3 | 36 | 2 | 3 |
| 2he6__ | 5  | 1 | 1 | 5  | 9  | 2 | 1 | 36 | 2 | 5 |
| 2wsc_G | 5  | 0 | 2 | 7  | 0  | 0 | 1 | 36 | 1 | 3 |
| 3b5w_A | 5  | 1 | 4 | 6  | 9  | 0 | 3 | 16 | 3 | 6 |
| 2g1x_A | 6  | 1 | 3 | 3  | 9  | 6 | 5 | 16 | 2 | 3 |
| 2gif_A | 6  | 3 | 7 | 7  | 4  | 6 | 1 | 16 | 2 | 4 |
| 3ixz_A | 7  | 2 | 4 | 3  | 4  | 4 | 5 | 1  | 8 | 3 |
| 3kg2_A | 7  | 2 | 6 | 3  | 1  | 3 | 5 | 16 | 9 | 6 |
| 2agv_A | 8  | 7 | 5 | 4  | 49 | 6 | 2 | 36 | 5 | 3 |
| 2amk_A | 8  | 5 | 2 | 9  | 36 | 3 | 2 | 36 | 2 | 4 |
| 3g5u_A | 9  | 6 | 9 | 5  | 1  | 2 | 3 | 64 | 5 | 6 |
| 1u5n_A | 10 | 9 | 6 | 10 | 4  | 5 | 7 | 16 | 7 | 6 |

Figure S9

| Data-b | Cluster | SS | ST | TT | SxxxS | SxxS | SxxT | TxxxT | TxxT | SxxxT |
|--------|---------|----|----|----|-------|------|------|-------|------|-------|
| 1mm4_A | 1       | 0  | 1  | 1  | 0     | 0    | 0    | 2     | 0    | 0     |
| 2f1c_X | 1       | 0  | 1  | 1  | 0     | 0    | 0    | 2     | 1    | 1     |
| 2k0l_A | 1       | 0  | 1  | 0  | 2     | 0    | 0    | 0     | 1    | 1     |
| 3hw9_A | 1       | 0  | 1  | 0  | 0     | 0    | 2    | 3     | 1    | 1     |
| 1fw2_A | 1       | 1  | 0  | 0  | 2     | 1    | 1    | 0     | 0    | 1     |
| 1orm_A | 1       | 1  | 1  | 1  | 2     | 0    | 1    | 2     | 0    | 1     |
| 1tlw_A | 1       | 1  | 2  | 0  | 1     | 1    | 1    | 1     | 0    | 0     |
| 2erv_A | 1       | 1  | 1  | 0  | 0     | 0    | 1    | 1     | 0    | 1     |
| 2f1t_A | 1       | 1  | 0  | 2  | 1     | 1    | 0    | 2     | 2    | 0     |
| 2qom_A | 1       | 1  | 1  | 0  | 2     | 3    | 1    | 1     | 1    | 1     |
| 2wjq_A | 1       | 1  | 0  | 1  | 1     | 2    | 2    | 1     | 1    | 2     |
| 3emo_C | 1       | 1  | 2  | 1  | 0     | 2    | 1    | 1     | 0    | 2     |
| 3fid_A | 1       | 1  | 0  | 0  | 1     | 1    | 1    | 1     | 1    | 2     |
| 1yc9_A | 1       | 2  | 2  | 1  | 2     | 1    | 1    | 0     | 0    | 1     |
| 2o4v_A | 1       | 3  | 1  | 2  | 0     | 1    | 0    | 0     | 1    | 3     |
| 3dwn_A | 1       | 3  | 1  | 3  | 0     | 2    | 2    | 3     | 1    | 4     |
| 1h6s_1 | 1       | 4  | 1  | 3  | 0     | 1    | 1    | 0     | 1    | 2     |
| 1uxf_A | 1       | 4  | 2  | 1  | 0     | 0    | 0    | 3     | 2    | 5     |
| 1uun_A | 2       | 0  | 1  | 2  | 2     | 0    | 3    | 0     | 0    | 0     |
| 1e54_A | 2       | 1  | 3  | 0  | 0     | 2    | 3    |       | 1    | 2     |
| 2por__ | 2       | 1  | 1  | 2  | 1     | 2    | 2    | 2     | 0    | 1     |
| 1a0s_P | 2       | 2  | 3  | 2  | 1     | 3    | 2    | 1     | 1    | 2     |
| 2odj_A | 2       | 2  | 0  | 3  | 1     | 1    | 4    | 1     | 1    | 0     |
| 1i78_A | 2       | 3  | 1  | 2  | 1     | 2    | 3    | 1     | 0    | 1     |
| 3emn_X | 2       | 3  |    | 1  | 0     | 2    | 4    | 0     | 3    | 0     |
| 7ahl_A | 2       | 3  | 2  | 2  | 1     | 2    | 3    | 2     | 4    | 2     |
| 3dwo_X | 3       | 2  | 1  | 1  | 3     | 1    | 0    | 5     | 1    | 4     |
| 2qdz_A | 3       | 1  | 2  | 0  | 3     | 2    | 3    | 4     | 0    | 4     |
| 3bry_A | 3       | 4  | 1  | 1  | 3     | 2    | 0    | 6     | 3    | 2     |
| 1mpr_A | 3       | 3  | 5  | 2  | 3     | 3    | 3    | 3     | 1    | 4     |
| 3kvn_X | 3       | 1  | 4  | 0  | 4     | 5    | 1    | 3     | 1    | 2     |
| 1p4t_A | 3       | 2  | 1  | 0  | 5     | 2    | 0    | 0     | 0    | 2     |
| 1tqq_A | 4       | 3  | 2  | 5  | 6     | 3    | 3    | 3     | 2    | 5     |
| 2guf_A | 4       | 3  | 3  | 4  | 5     | 1    | 4    | 6     | 4    | 2     |
| 1k24_A | 4       | 4  | 1  | 2  | 5     | 3    | 2    | 3     | 4    | 2     |
| 1kmo_A | 4       | 4  | 4  | 2  | 5     | 2    | 4    | 4     | 3    | 0     |
| 1wp1_A | 4       | 1  | 1  | 3  | 3     | 0    | 3    | 3     | 3    | 3     |
| 1uyn_X | 4       | 0  | 4  | 1  | 3     | 2    | 2    | 4     | 3    | 2     |
| 2iah_A | 4       | 4  | 3  | 1  | 3     | 1    | 3    | 3     | 6    | 5     |
| 3jty_A | 4       | 1  | 1  | 0  | 3     | 2    | 2    | 1     | 3    | 2     |
| 2grx_A | 5       | 5  | 0  | 4  | 1     | 2    | 5    | 3     | 4    | 8     |
| 2hdf_A | 5       | 7  | 1  | 4  | 4     | 2    | 6    | 8     | 4    | 7     |
| 1fep_A | 6       | 2  | 5  | 6  | 2     | 4    | 4    | 8     | 6    | 6     |
| 1xkw_A | 6       | 1  | 4  | 7  | 6     | 1    | 4    | 5     | 6    | 3     |
| 3efm_A | 6       | 1  | 2  | 5  | 6     | 2    | 3    | 7     | 6    | 5     |
| 1v36_A | 7       | 5  | 8  | 3  | 4     | 3    | 1    | 4     | 5    | 6     |
| 3csl_A | 8       | 7  | 4  | 5  | 4     | 8    | 4    | 6     | 3    | 4     |
| 3fhh_A | 8       | 11 | 5  | 6  | 3     | 5    | 1    | 5     | 5    | 4     |

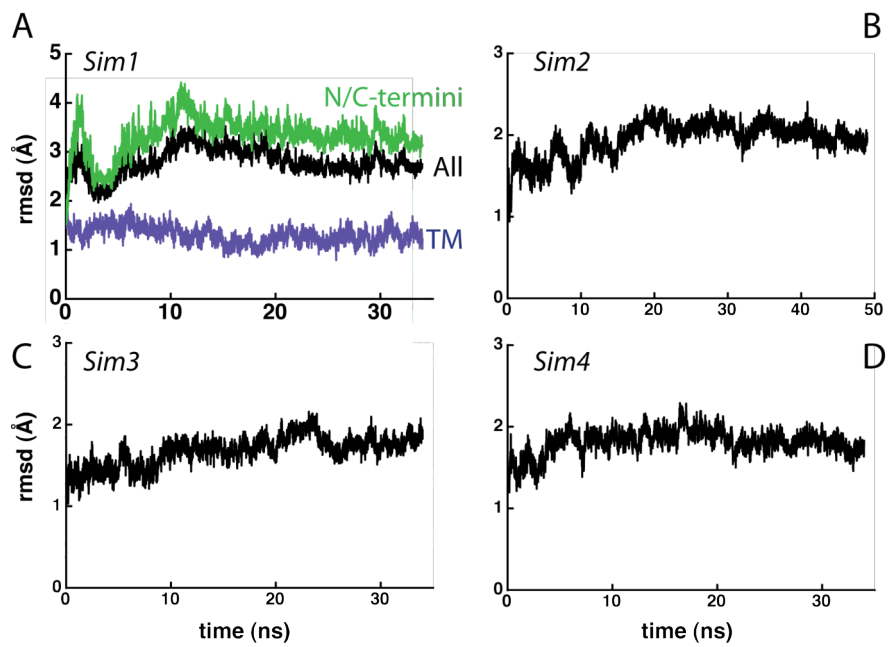

Figure S10

## Supplementary Information References

Aller SG, Yu J, Ward A, Weng Y, Chittaboina S, Zhuo R, Harrel PM, Trinh YT, Zhang Q, Urbatsch IL, Chang G (2009) Structure of P-glycoprotein reveals a molecular basis for poly-specific drug binding. *Science* 323:1718-1722.

Belrhali H, Nollert P, Royant A, Menzel C, Rosenbusch JP, Landau EM, Pebay-Peyroula E (1999) Protein, lipid and water organization in bacteriorhodopsin crystals: a molecular view of the purple membrane at 1.9 Å resolution. *Structure* 7:909–917.

Brillet K, Meksem A, Cobessi D. Crystal structure of the heme/hemoglobin outer membrane transporter ShuA from *Shigella dysenteriae*. DOI:10.2210/pdb3fhh/pdb.

Buchanan S, Lukacik P, Grizot S, Ghirlando R, Ali MM, Barnard TJ, Jakes KS, Kienker PK, Esser L (2007) Structure of colicin I receptor bound to the R domain of colicin Ia: implications for protein import. *EMBO J* 26:2594-2604.

Cortes, DM, Cuello, LG, Perozo, E (2001) Molecular architecture of full-length KcsA: role of cytoplasmic domains in ion permeation and activation gating. *J Gen Physiol* 117:165-180.

Dong C, Beis K, Nesper J, Brunkan-LaMontagne AL, Clarke BR, Whitfield C, Naismith JH (2006) Wza the translocon for *E. coli* capsular polysaccharides defines a new class of membrane protein. *Nature* 444:226-229.

Fang Y, Jayaram H, Shane T, Kolmakova-Partensky L, Wu F, Williams C, Xiong Y, Miller C (2009) Structure of a prokaryotic virtual proton pump at 3.2 Å resolution. *Nature* 460:1040-1043.

Gulbis JM, Kuo A, Smith B, Doyle DA, Edwards A, Arrowsmith C, Sundstrom M. Intermediate gating structure 1 of the inwardly rectifying K<sup>+</sup> channel KirBac3.1. DOI:10.2210/pdb1xl4/pdb

Kawate T, Michel JC, Birdsong WT, Gouaux E (2009) Crystal structure of the ATP-gated P2X<sub>4</sub> ion channel in the closed state. *Nature* 460: 592-598.

Krieg S, Huche F, Diederichs K, Izadi-Pruneyre N, Lecroisey A, Wandersman C, Delepelaire P, Welte W (2009). Heme uptake across the outer membrane as revealed by crystal structures of the receptor-hemophore complex. *Proc Natl Acad Sci USA* 106:1045-1050.

Kühlbrandt W, Zeelen J, Dietrich J (2002) Structure, mechanism, and regulation of the *Neurospora* plasma membrane H<sup>+</sup>-ATPase. *Science* 297:1692-1696.

Li B, Nowak NM, Kim SK, Jacobson KA, Bagheri A, Schmidt C, Wess J, Theoretical model of rat M3 muscarinic rat receptor. <http://www.pdb.org/pdb> ID 2amk.

Lupo D, Li X-D, Durand A, Tomizaki T, Cherif-Zahar B, Matassi G, Merrik M, Winkler FK (2007) The 1.3 Å resolution structure of *Nitrosomonas europaea* Rh50 and mechanistic

implications for NH<sub>3</sub> transport by Rhesus family proteins. *Proc Natl Acad Sci USA* 104:19303-19308.

Obara K, Miyashita N, Xu C, Toyoshima I, Sugita Y, Inesi G, Toyoshima C (2005) Structural role of countertransport revealed in Ca<sup>2+</sup> pump crystal structure in the absence of Ca<sup>2+</sup>. *Proc Natl Acad Sci USA* 102:14489-14496.

Pederson BP, Buch-Pedersen MJ, Morth JP, Palmgren MG, Nissen P (2007) Crystal structure of the plasma membrane proton pump. *Nature* 450:1111-1114.

Sobolevsky AI, Rosconi MP, Gouaux E (2009) X-ray structure, symmetry and mechanism of an AMPA-subtype glutamate receptor. *Nature* 462:745-756.

Stenkamp RE (2008) Alternative models for two crystal structures of bovine rhodopsin. *Acta Crystallogr D* 64:902-904

Subbarao GV, van der Berg B (2006) Crystal structure of the monomeric porin OmpG. *J Mol Biol* 360:750-759.

Sui H, Han B-G, Lee JK, Wallan P, Jap BK (2001) Structural basis of water-specific transport through the AQP1 water channel. *Nature* 414:872-878.
